# Supplementary material for: Understanding snow saltation parameterizations: lessons from theory, experiments and numerical simulations
Source: Copernicus journal article supplement (doi:10.5194/egusphere-2023-488), 2023-04-04
Supplement: Supplementary file [file egusphere-2023-488-AC1-supplement.pdf]

## Reply to Reviewer #1

The authors response to the comments of the first reviewer is presented in this document. We would like to thank the reviewer for the constructive comments and suggestions. We believe that the review process will make the manuscript more clear and complete. We apologize for the delay in providing an answer – this was related to the completion of the doctoral studies of the first author. At the end of this document, you can find the Track-changes file where we highlight the modifications made to the manuscript up to now. The line numbering in our answers refers to the Track-changes version of the manuscript. Comments colored in **blue** are related to the Introduction. They require a deeper review of the literature which will be completed by the authors when submitting the revised manuscript.

### General comment:

*[...] As it stands, the manuscript needs to be improved prior to consideration for publication. The introduction material is currently a bit underdeveloped. The authors are presenting an advancement of a topic that has been studied in a large number of scenarios, which a wide range of applications as is shown in Section 2 when the actual parameterizations are being discussed. As well, the title suggests a kind of review of the state of the field. The authors do not present a sufficiently wide view of the topic in the introduction. I strongly suggest a deeper review of the available studies. Snow transport and snow saltation has been studied and modeled since at least the 1950's, but the case studies selected to summarize the field and the complexities of the topic are a bit sparse and lacking. For example, the authors have a tendency to cite Antarctic studies in the intro, but the benchmark snow flux profile study of Budd et al. (1966) in Antarctica is not referenced. Perhaps the title would be better suited as "Understanding snow saltation in atmospheric modeling parameterizations".*

Thank you for this comment. The main goal of the introduction was to motivate the need to better assess snow saltation parameterizations and, therefore, the analysis performed in this manuscript. However, we agree that the introduction can be expanded to provide to the reader a wider view of the topic. In this regard, the study of Budd et al. (1966) will be analyzed and included in the manuscript, as well as other references addressing the study of snow transport in the Arctic and in mountainous terrain. Nevertheless, we would like to clarify that this work does not intend to be a review of the state of the field as a whole, but to review snow saltation parameterizations and to further investigate them with a numerical model. Regarding the title, we would prefer to keep it as it

is. In our view, it correctly captures the content of the manuscript. Even though we focus on parameterizations used in atmospheric models, we believe that this work is of interested to everyone requiring a simple description of snow saltation.

**Specific comments:**

*L20-22: Sastrugi?*

A mention to sastrugi was added to the text (1.21).

*L28-29: Do you have a citation for this convention?*

We now cite the works of Li and Pomeroy (1997) and Lenaerts et al. (2012), who mention this convention in their articles (1.28-32). In the websites of the World Meteorological Organization (WMO)<sup>1</sup> and of the American Meteorological Society (AMS)<sup>2</sup>, the same definitions can be found. The definition given by the WMO was previously cited in the work of Gauer (2001).

<sup>1</sup>WMO World Meteorological Organization. (2017). Hydrometeors consisting of an ensemble of particles raised by the wind: Drifting and Blowing Snow. Retrieved October 16, 2023, from <https://cloudatlas.wmo.int/en/drifting-and-blowing-snow.html>

<sup>2</sup>AMS American Meteorological Society. (2012). Glossary of Meteorology: Drifting Snow. Retrieved October 16, 2023, from [https://glossary.ametsoc.org/wiki/Drifting\\_snow](https://glossary.ametsoc.org/wiki/Drifting_snow)

*L28-39: This paragraph started off with descriptions of blowing snow, and then focuses solely on Antarctica. Given the amount of time you spend on non-Antarctic snow studies in the remainder of the manuscript, it's a bit strange to limit to such a specific niche here. Please include a broader review.*

We will include some statements presenting the importance of drifting snow transport and sublimation to the surface mass balance and snowpack stability of non-Antarctic snow covered sites.

*L37-39: I am certain the authors can find an older reference to this complication than this.*

We will replace the citation or add older ones to this statement. Thank you for pointing it out.

*L40-46: Again, this focuses solely on drifting snow in Antarctica. This is a bit strange in a general discussion of drifting snow. Given the number of studies on snow sublimation from field-based, hydrological, and numerical studies, it also seems odd that the authors are using a regional weather model and satellite observations.*

The goal of this paragraph was to showcase the disagreement between large-scale models and measurements. We will analyze the literature so that we can extend the paragraph with additional examples that point in the same or opposite direction. If needed, the statement presented in 1.47-49 will be made lighter.

*L53-54: I do not believe it is widely accepted that snow particles that travel in suspension only arise from particles that have undergone fragmentation. There are no whole snow particles in suspension?*

We agree with the reviewer. We were presenting a narrow definition of particles in suspension. The reference to particle fragmentation was therefore deleted from the text (1.56-57).

*L56: This model of snow redistribution far precedes the referenced literature including, but not limited to (Dyunin, 1967; Lee, 1975; Dyunin, 1980; Pomeroy et al., 1993; Gauer, 1998; Bintanja, 2000)*

We agree with the reviewer. In the manuscript, we have cited atmospheric and snow models that use the mentioned approach instead of the works that introduced this methodology. We will modify the citation list.

*L62: It would be helpful to cite the sublimation models that use the Thorpe and Mason approximations.*

The models that use the approximations of Thorpe and Mason (1966) are now cited in the text. In addition, a reference to the model of Lin et al. (1983), used by Amory et al. (2021), was added (1.65-67).

*L66: Again, the references to modeling snow redistribution are a bit silo'd as they tend towards recent research from adjacent groups. These issues have been mentioned or studied for many decades, even in mountainous terrain (e.g. Dyunin et al., 1977; Schmidt, 1982; Gauer, 1998).*

Thank you for this comment. We will modify the citation list so that it better represents the variety of studies on the topic.

*L65-76: There is again a strange tendency towards Antarctic research, which is not where the majority of drifting snow research has actually been conducted. Snow redistribution was coupled in a GCM by Eric Brun back in the 1980's.*

In this paragraph, we intend to showcase the sensitivity of drifting snow models to the parameters chosen in the snow saltation model. We believe that the sensitivity studies performed with MAR and RACMO are good examples. Nevertheless, following the reviewer's comment, we will revise the literature and look for other sensitivity studies.

*L101: Spanwise?*

Thank you for the suggestion. The term "spanwise" can indeed be used as a synonym for "crosswise". However, in our view, the term "crosswise" relates well with the term "cross section area", so we would prefer to keep it.

*L103-105: What do you mean statistically invariant? The temporal-average of windspeed is constant on each wall-parallel plane? And can you define "mainly" aligned?*

Yes, with "statistically invariant along the horizontal directions" we want to convey that the temporal-averages of wind velocity do not vary in x and y, therefore, they are constant on each wall-parallel plane. We have reformulated the sentence to make it more clear (l.120-122). With "mainly aligned with the streamwise direction", we intended to inform the reader that the x-axis is aligned with the time-average horizontal flow direction. However, taking into account that this is a natural consequence of imposing a streamwise pressure gradient, this information was deleted from the text.

*L106-110: Strictly speaking, between the viscous sublayer at the surface and the inertial sublayer is a buffer sublayer where you do not have a fluid velocity profile that provides a constant shear stress. Furthermore, the log-layer or inertial sublayer also only exists for a finite height in the*

*atmosphere. It would benefit the authors and the reader if the authors could address what assumptions we need to make for this sort of shear stress profile they are describing, and what is assumed to happen to the buffer layer in the presence of saltating particles. Typically some sort of roughness height is included in a log-law profile (which comes from the constant shear stress assumption) at which the wind essentially goes to zero above the actual snow surface, though this is widely known to not be physically true, but it helps close the equations. This roughness length is not mentioned anywhere, though often also modified to account for the momentum deficit caused by the saltation layers that the authors are referencing. This dates back to Bagnold.*

The reviewer is making a link between a logarithmic profile and a constant shear stress. However, in rigor, the link that exists is between a logarithmic profile and a constant turbulent shear stress. Over the whole inner layer (viscous, buffer, and logarithmic sublayers), the total shear stress (the sum of viscous and turbulent shear stresses) is expected to be constant (Schlichting and Gersten, 2017: eq. 17.1 in p.520). However, in the viscous sublayer, the viscous shear stress is dominant and the resultant velocity profile is linear, while in the logarithmic sublayer the turbulent shear stress is dominant and the velocity profile is logarithmic. This was made clear in the text (l.124-146). In this new paragraph, we have also stated the region of validity of the logarithmic profile in the atmospheric boundary layer, the effect of roughness on the boundary layer structure, and the use of an equivalent roughness length to describe the velocity profile above the saltation layer. Taking into account that the size of this section increased substantially, we have decided to create a new subsection (2.1 The steady state assumption), which is preceded from an introductory paragraph. In this way, l.163-170 were deleted from the text.

*L171-172: Did Bagnold show that the necessary shear stress was smaller, or that a smaller friction velocity was sufficient, given that  $\tau = \rho u_*^2$  is only an "effective" shear stress at the surface.*

We have clarified the definition of  $\tau = \rho u_*^2$ , which is now defined as the “shear stress in the logarithmic sublayer” (l.135-136). Thus,  $\tau$  can be interpreted as the value of shear stress measured with the eddy covariance method or from fitting the wind velocity profile to a logarithmic function. Therefore, we would prefer not to name  $\tau$  the "effective shear stress at the surface”, but to clearly distinguish  $\tau$  (the shear stress in the logarithmic sublayer) from  $\tau_s$  (the shear stress at the surface). These two quantities assume equal values only in the absence of saltating particles or at the thresholds for saltation onset and cessation. In this context, the difference between “the necessary shear stress was smaller” and “a smaller friction velocity was sufficient” is not clear to us. Bagnold (1941) deduced the friction velocity from wind velocity measurements performed in the logarithmic

sublayer. In this way, Bagnold's conclusions refer to the friction velocity  $u_*$  and not  $u_{*,s}$  (as defined in the manuscript). However, as mentioned above, at the limiting threshold shear stresses (fluid and impact thresholds) the surface shear stress and the shear stress outside the saltation layer are expected to assume similar figures due to the low number of particles aloft and the respective small momentum exchange between the fluid and the particles. This is now mentioned in the text (l.211-215).

*L173: Requires, not implies?*

This was modified in the text (l.216).

*L192-193: What is the fluid threshold friction velocity?*

In the manuscript, the fluid threshold was defined in the Introduction (l.74-75). However, as this is not ideal, the fluid threshold is now presented at the beginning of section 2.2.1 (l.196-198). The Introduction was modified accordingly (l.74-82).

*L193-194: Please rewrite this sentence. It is equal because it is assumed to be a fraction, and we assume this fraction is 1?*

The assumption that  $\tau_s$  is equal to  $\tau_{ft}$  (therefore, that  $\tau_s$  is a fraction of  $\tau_{ft}$  and that this fraction is assumed to be 1, as pointed out by the reviewer) is not in agreement with Owen's claim. Owen (1964) specifically claims that  $\tau_s$  must be smaller than  $\tau_{ft}$  because the particle bombardment at the surface contributes to dislodging the grains. The text was modified to make this claim more clear (l.208-210, l.236-238).

*L196: Nor is it in agreement with experimental evidence dating back to Bagnold.*

A reference to the wind tunnel experiments of Bagnold (1941) was added to the text (l.240-241).

*L196: Now i'm confused. I thought  $\tau_s$  was the approximated surface shear stress, which varies with windspeed. I believe you are actually referencing  $\tau_{it}$ , but using its equality with  $\tau_s$  in this one instance. Can you replace  $\tau_s$  with  $\tau_{it}$  to make the following inequalities clearer?*

In the text,  $\tau_s$  is defined as the actual (not approximate) surface shear stress during saltation (see l.137-138 and l.145-146). In addition, we follow Bagnold (1941) and define  $\tau_{it}$  as the lower shear stress outside the saltation layer for which saltating particles maintain a steady state motion (l.207-

208). Therefore, the impact threshold is a well defined value that characterizes the bed and it is invariant with respect to  $u^*$ . Differently,  $\tau_s$  may vary with  $u^*$ . As discussed in section 2.2.1, Owen (1964) hypothesizes that  $\tau_s = \tau_{it}$ , atmospheric models frequently assume that  $\tau_s = \tau_{it}$  (e.g., Lenaerts et al., 2012; Amory et al., 2021; Vionnet et al., 2014), but some numerical models revealed that  $\tau_s$  is not invariant with respect to  $u^*$ . We hope that Table 1 (page 9), suggested by the second reviewer, helps clarifying the different shear stresses.

*Does Figure 2 include the decay height of all experiments mentioned in Section 2.2.3?*

No, Figure 2 includes only the experimental measurements of Sugiura et al. (1998), Namikas (2003), Nishimura and Nemoto (2005), and Martin and Kok (2017), as stated in 1.515-517. The obtained values of decay height are discussed in the paragraphs that follow. The results of Sato et al. (2001), which are also mentioned, are not presented in Figure 2 because the respective value of  $u^*$  was not provided by the authors. This is currently specified in the text (1.534-535). In 1.555-556, we also refer to the results of Nalpanis et al. (1993), but we do not present them in the figure. As they consist of only 2 data points, we have decided not to include them in the comparison.

*L552: What is the subgrid-scale relative to the particle size? At what scale can we expect the snow particle to stop responding to fluctuations, and why?*

As mentioned in section 3.2, the domain is a cube of 6.4 m length, uniformly discretized in each horizontal direction in 64 cells (i.e,  $\Delta x = \Delta y = 0.1$  m). The mesh in the vertical direction follows a hyperbolic stretching: it varies from  $\Delta z = 0.01$  m along the first 15 cm above the surface to  $\Delta z = 0.1$  m close to the top boundary. Therefore,  $\Delta = (\Delta x \cdot \Delta y \cdot \Delta z)^{1/3}$  varies between 0.05 and 0.1 m. Taking into account that the mean diameter is set to  $360 \cdot 10^{-6}$  m, the ratio between  $\Delta$  and the mean diameter varies between approximately 130 and 280.

The ability of the snow particles to follow the velocity fluctuations can be evaluated by computing the Stokes number,  $St$ , which is a function of the particle relaxation time and the velocity and length scales of interest. If  $St \ll 1$ , the particles will mainly follow the flow. The opposite is true if  $St \gg 1$ . Therefore, the maximum frequency of the wind velocity signal that is able to influence a particle trajectory depends on the particle diameter and Reynolds number. This analysis was not performed in the context of this work.

*L559-561: This is not a comprehensive list of all forces acting on a particle in a turbulent flow. Beyond gravity (buoyancy) and drag, there are also force terms from the wind, the force from the fluid moving with the particle, and the Basset-Boussinesq memory (Maxey and Riley, 1983; Talaei and Garrett, 2020).*

We agree with the reviewer. Indeed, we are not presenting a complete list of forces applied on the particles. Our intention was to provide some examples. We have rephrased the text to make this more clear (1.608-609).

*L566: “entrainment”*

Corrected.

*L570: Is it assumed there is an infinite number of particles that are available to be entrained?*

A sufficiently large initial deposition is specified in the simulations in order to guarantee that snow transport is never limited by a shortage in the supply of erodible particles. This is now mentioned in the text (1.624-625).

*L576: Modulus*

Corrected.

*Figure 5: Can you discuss these decreases in the inset plots more? This seems like an interesting point that is glossed over rather quickly. As well, it would be helpful to include two more plots that compare the average particle velocities with the average wind speeds in the two directions at each height, for the various scenarios. The influence of vertical winds on ascending saltating particle is particularly interesting to think about as this is a primary factor driving the transition to suspension and away from the paradigms described here. Perhaps a vertical profile of vertical drag (normalized by gravity forces) could reveal these relationships?*

Thank you for this comment. We have added the average vertical profiles of streamwise wind velocity to the manuscript (Figure 7). This plot shows that the model correctly predicts the existence of a focus point when saltation is dominated by splash (please note that the focus point was previously introduced in section 2.3.2, 1.464-467). The analysis of the wind velocity profiles allowed us to better understand the observed decrease in near-surface particle velocity (1.745-763). In this context, the comment regarding the particles deceleration as they approach the surface was



deleted (1.763-766). In fact, above 5 mm height above the surface (first grid point), the average wind velocity is always greater than the average particle streamwise velocity. This can be seen in more detail in the figures below, where we present separately the average streamwise velocity of the upward and downward moving particles (not shown in the manuscript). If we assume a logarithmic profile below the first grid point characterized by  $u_{*,s}$  and  $z_0=10^{-4}$  m, the average streamwise wind velocity will be smaller than the average streamwise velocity of the downward moving particles below approximately 2 times the average grain diameter. However, in the model, the surface processes of rebound and splash occur as soon as the particles reach a height lower than 4 times the average particle diameter (1.4 mm in the current setup). Therefore, in the simulations, the drag force in the streamwise direction is on average always positive and the decrease of the near-surface particle velocity as  $u_*$  rises above  $0.39 \text{ m s}^{-1}$  is mainly related to the respective decrease in streamwise wind velocity below the focus point ( $\sim 1 \text{ cm}$  height).

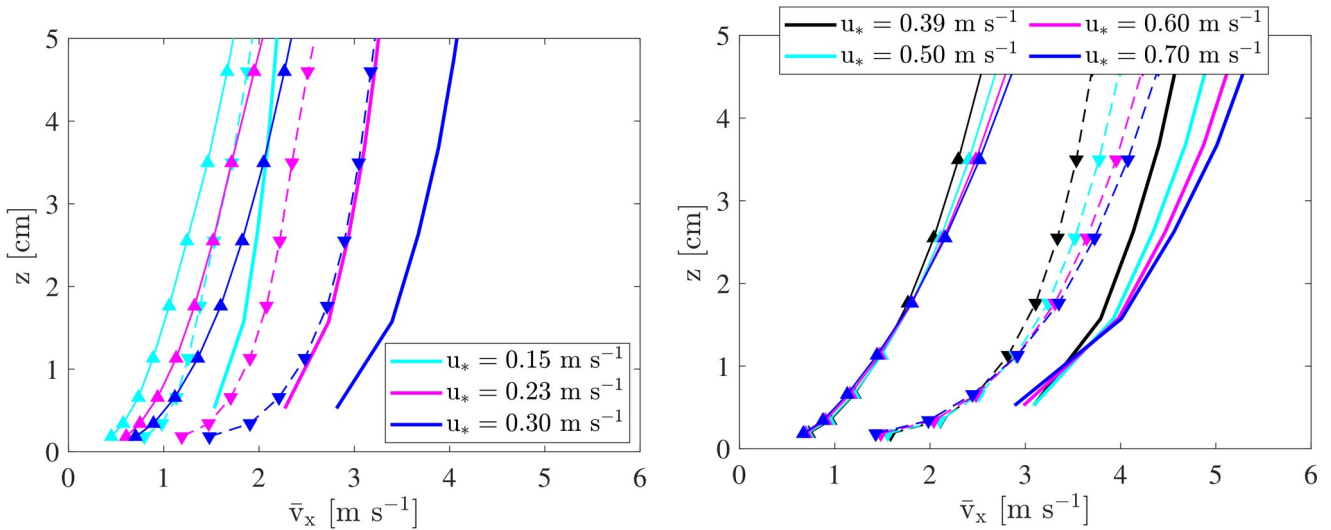

Figure I: Vertical profiles of average wind and particle streamwise velocity. The thick lines correspond to the wind velocity, the thin lines with upward pointing triangles correspond to the upward moving particles, and the dashed lines with downward pointing triangles correspond to the downward moving particles.

The average wind velocity in the vertical direction is presented on the figure below (not shown in the manuscript). As expected from a half-channel flow, it is mainly zero. It reaches higher values close to the surface, but it is nevertheless several orders of magnitude smaller than the average particle vertical velocity (Figure 5b). Therefore, over a flat surface subjected to a streamwise pressure gradient, the average vertical wind velocity has a negligible effect on driving the transition from saltation to suspension. Small particles reach higher elevations mainly due to the effect of velocity fluctuations. High instantaneous velocities may induce an instantaneous vertical drag force

greater than the particle weight, which transports the particles upward. Overall, while the gravitational force pushes the particles downward, turbulence promotes particle dispersion and a homogeneous concentration of particles aloft.

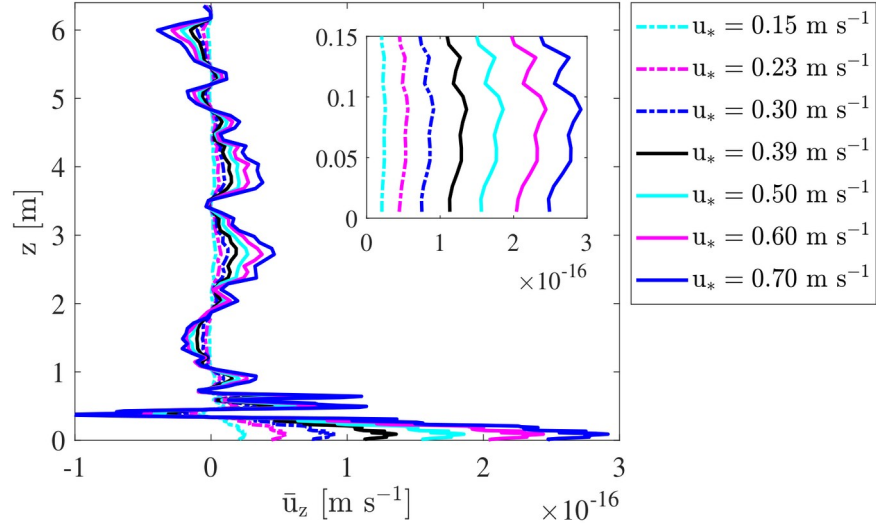

Figure II: Vertical profile of average wind velocity in the vertical direction obtained for different friction velocities. In the inset, a zoom-in to the near-surface region is presented.

The vertical profiles of aerodynamic drag in the streamwise and vertical directions are presented below for completeness (not shown in the manuscript). As expected, the vertical component of aerodynamic drag is much smaller than its streamwise component.

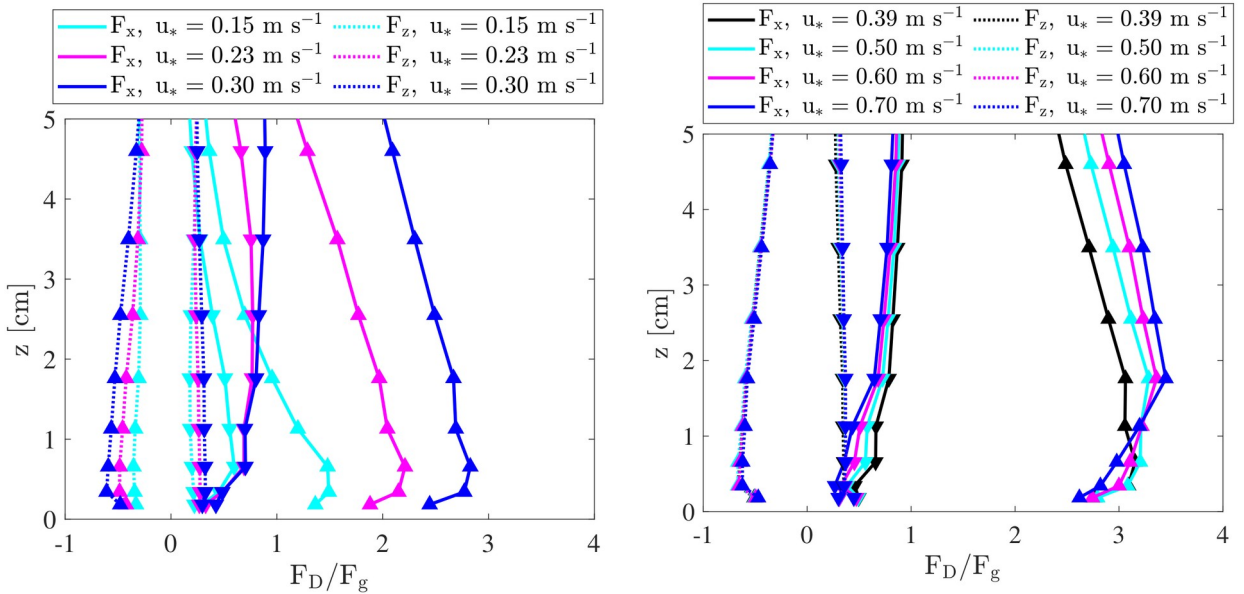

Figure III: Vertical profiles of aerodynamic drag in the streamwise and vertical directions normalized by the gravitational force. The different colors correspond to the different friction velocities. The upward pointing triangles correspond to the upward moving particles and the downward pointing triangles correspond to the downward moving ones.

L606-607: How many actual lagrangian particles were in transport at a given time? How does this assumption of clustering work? When a splash event occurs at a friction velocity of 0.3, you automatically assume 50 snow particles are ejected at that single location? And when you have an impact of a Lagrangian parcel, are you calculating the force of 50 times the mass equally distributed among the splashed particles? Admittedly this would create more pseudo-particles in transport while not requiring any additional Lagrangian computations, but the fact that each parcel at a given friction velocity has the same number of particles is worrisome. I see it would be difficult to truly track all the particles in a 6 m cube, but you are also manipulating the mass flux by enforcing these rules. I think there may be negligible effect on the relative concentration profiles, but some further explanation is needed here. If you instead chose to have 1000 particles in a lagrangian parcel, would this have a noticeable impact on your snow-wind feedback?

The total number of parcels aloft (lagrangian particles) averaged along the last 100 s of each simulation are presented in Figure IVa (not shown in the manuscript). Depending on the friction velocity, we simulate on average between  $10^4$  and  $3.5 \times 10^4$  parcels. The total number of particles aloft (number of parcels x number of particles per parcel (PPP)) is presented in Figure IVb (not shown in the manuscript). Particles of the same parcel have the same diameter and follow the same trajectory. Therefore, they were aerodynamically entrained or splashed at the same surface location and time step (this is stated in the text in l.660-662).

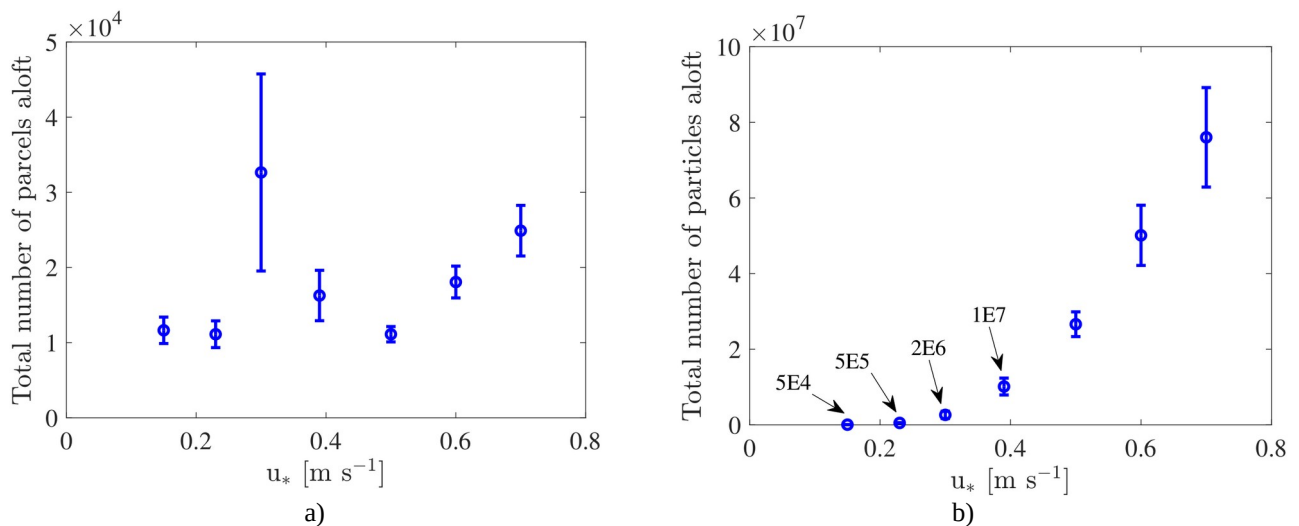

Figure IV: Average number of parcels aloft obtained for different friction velocities (a) and the respective number of particles aloft (b). The error bars correspond to two times the standard deviation.

For  $u_*=0.3 m s^{-1}$ , for which PPP=100 (see corrected PPP values in l.663), the impact of one parcel corresponds to the impact of 100 particles. Taking into account the mass and impact kinetic energy

of 1 particle, we compute how many particles are splashed. Let's imagine that the model yields the value of 3. In this case, each particle ejects 3 particles, which means that the 100 particles will eject a total of 300 particles. Therefore, 3 new parcels (with 100 particles each) are ejected into the flow. For each ejected parcel, the diameter and initial ejection velocity of all particles in that parcel are a random realization of a normal and exponential distributions, respectively.

Indeed, the clustering of particles in groups reduces the variability of trajectories and grain size aloft represented by the model. Nevertheless, this simplification is expected to yield acceptable figures if the total number of parcels aloft is large enough so that the variability of trajectories and grain size is sufficiently represented. In the figure below, we present the effect of the number of PPP on the surface friction velocity averaged over the last 100 s of the simulations. It can be seen that the number of PPP has a more significant impact on the results for  $u_* > 0.3 \text{ m s}^{-1}$ . For  $u_*=0.39 \text{ m s}^{-1}$ , similar results were obtained when considering  $\text{PPP} = 200$  in comparison with the simulations for which the number of PPP was allowed to vary between 500 and 1000. Therefore,  $\text{PPP} = 200$  was considered acceptable for the analysis of average quantities undertaken. For the higher friction velocities ( $u_* > 0.4 \text{ m s}^{-1}$ ), additional simulations with a PPP smaller than 200 are still needed to confirm the convergence of the simulation results. However, this verification was not performed due to the computational cost of the simulations.

In our view, a sensitivity analysis to the different model parameters is outside the scope of this article. Therefore, this discussion was not added to the manuscript.

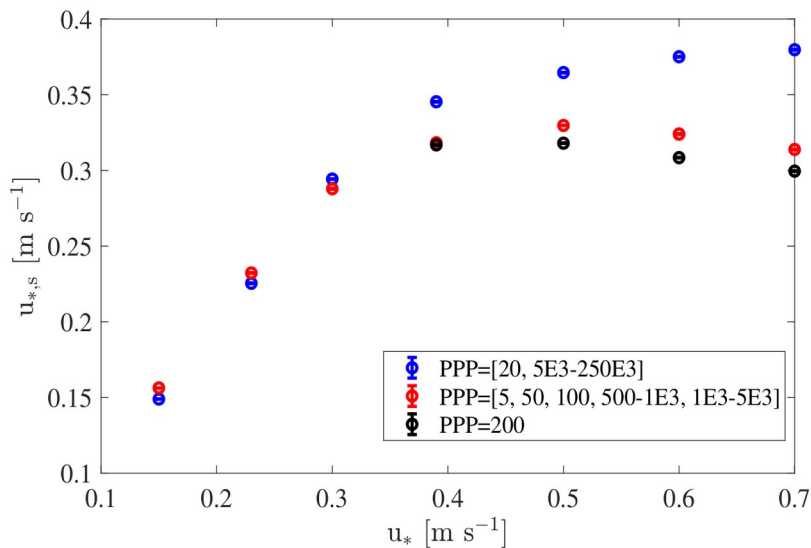

Figure V: Average surface friction velocity obtained for different friction velocities and different number of PPP. In the legend, the number of PPP is presented in increasing order of  $u_*$ . The last value of the array is representative of the remaining friction velocities.

L619: How is steady state quantified? Any subset of the 100 seconds would provide the same mean profiles? Can you please provide some verification of this?

The time series of the mass aloft per unit surface area is presented on the figure below for the various friction velocities studied (not shown in the manuscript). In the simulations, saltation is allowed to take place after  $t=25$  s. Following an initial rise in mass aloft, the mass of particles decreases with time until it reaches a stable value. From observing the time series, we have assumed that this equilibrium was reached after 250 s for all simulations. We have adapted 1.673-674 to better illustrate our approach.

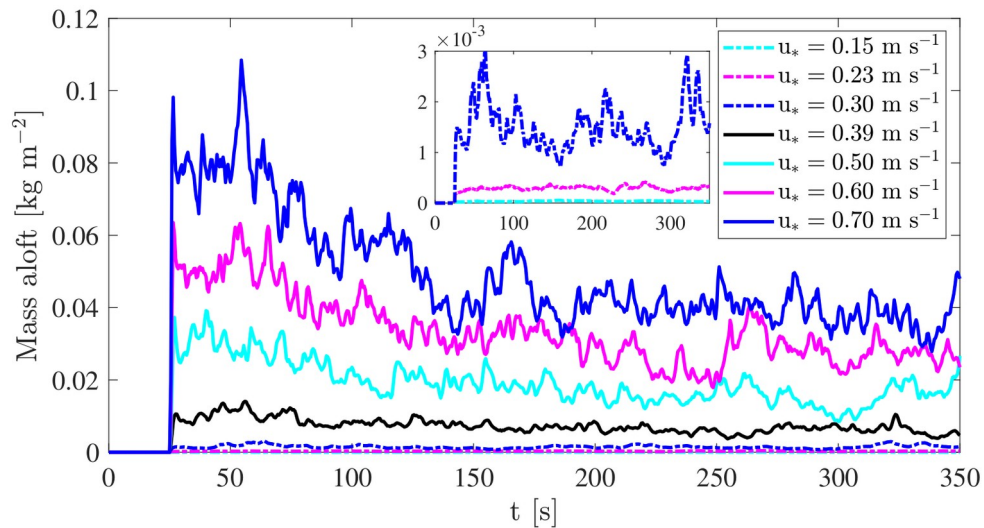

Figure VI: Time series of the mass of particles aloft per unit surface area obtained with different friction velocities. The inset is a zoom-in to the three lowest values of  $u_*$ .

In Figure VII (not shown in the manuscript), we present the average mass aloft computed with an increasing number of points (the value at  $t=250$  s is the instantaneous mass aloft at  $t=250$  s and the value at  $t=350$  s is the average considering the previous 100 s of the simulations). It can be seen that 100 s is sufficient to arrive to a relatively stable average. For the higher friction velocities ( $u_* > 0.5$  m s<sup>-1</sup>), improved statistics would probably be obtained by extending the computational time (for instance, with additional 100 s). This was not performed due to the computational cost of the simulations.

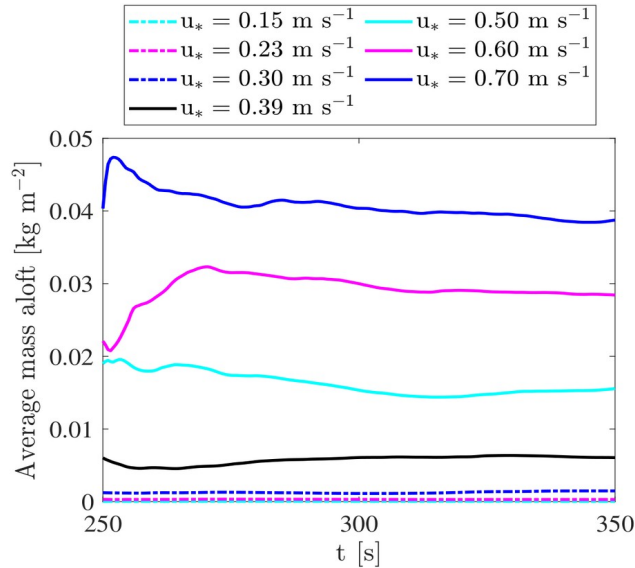

Figure VII: Average mass of particles aloft per unit surface area for an increasing number of data points. Results obtained for all friction velocities studied.

L623-624: *Most of the numerical mass flux profiles.*

Even though the fit is not shown, this is also true for the presented experimental profiles. Therefore, no modification was made in the text.

L657: *Does the average vertical ejection velocity combine both the splashed particles and the rebounded particles? Please clarify here.*

The average vertical ejection velocity is computed from all particles aloft (aerodynamically entrained, splashed or rebounded particles). Throughout the text, we use the term “ejection velocity” as a synonym for the initial particle velocity without making any distinction regarding its origin (see sections 2.2, 2.2.2, and 3.1). Therefore, we believe that it is not necessary to clarify this in the text.

Figure 5: *I think  $v_z^{\{up\}}$  would be a better notation as you are elsewhere using superscripts to denote subsets of velocities in the direction specified in the subscript*

Thank you for the suggestion. This was modified in the figure.

L664: *Particle velocity profile is mainly invariant*

This was modified in the text.

*L678-679: Please clarify if this is something you are enforcing in the model, or a result of your model.*

In the model, the ejection velocity of aerodynamically entrained particles is a random realization from a lognormal distribution. However, the mean value of the distribution is proportional to  $u_{*,s}$ . This was made clear in the text when describing the numerical model (l.621-623). Therefore, when aerodynamic entrainment is the main entrainment mechanism, which is the case for  $u_*$  varying between 0.15 and 0.3 m s<sup>-1</sup>, the average ejection velocity will be necessarily proportional to  $u_{*,s}$ . This was made clearer in the text by replacing “is justified by” with “is a direct consequence of” (l.737). Nonetheless, the fact that aerodynamic entrainment is the main entrainment mechanism for  $u_*$  varying between 0.15 and 0.3 m s<sup>-1</sup> is a result of the model.

*Figure 6: As stated above I think it's weird to be using mass flux instead of a relative number flux given that the mass flux seems to be directly modified by this lagrangian parcel idea.*

When computing the mass flux profile, the mass of each parcel aloft is computed by multiplying the mass of one individual particle times the number of PPP. Similarly, to compute the number flux profile, the number of particles in each parcel aloft would be equal to the number of PPP. In both calculations, each of these particles is assumed to travel at the same velocity: the velocity of the parcel. Therefore, we are expecting the mass flux and the number flux to be equally sensitive to the number of PPP. Therefore, we disagree with the reviewer's comment and no modifications were made in the text.

*L682-683: I thought the relationship between impacting particle and splash velocity was stochastic?*

In the model, the ejection velocity of splashed particles is a random realization from an exponential distribution. The mean value of the distribution is a function of the particle impact velocity. This was made clear in the text when describing the numerical model (l.634-635). In addition, the word “average” was added to the text (l.727).

*L685-686: It would be good to show wind profiles for your full range of friction velocities from the surface to above the saltation layer and that show and quantify this invariance as that is actually a non-trivial conclusion. What do relative velocity changes look like at each height?*

As suggested, the streamwise wind velocity profiles were added to the manuscript (see reply to comment on Figure 5 in page 8). The streamwise wind velocity is approximately invariant with respect to  $u^*$  in the near-surface region when saltation is dominated by splash. This is due to the existence of a focus point which was previously observed by Bagnold (1941) in wind tunnel experiments. From Figure I in this document, one can assess the relative velocity in the first 5 cm above the surface. As expected, the upgoing particles experience a greater relative velocity than the downgoing ones.

*L686-687: This is an interesting point as well. When do particles in saltation have a change in sign for the drag? Assuming a non-slip velocity at the immediate snow surface, it should always occur somewhere. Is this accounted for in your snow-wind feedback? As we approach steady-state, and snow particles are already quickly moving, at what fraction of maximum trajectory height does that of transition drag sign-change occur? How does this momentum source for the wind balance with the momentum sink caused by the presence of particles? In turn, what role does this play in modifying  $u^*$  or  $u^*,s$ ?*

As mentioned in the reply to comment on Figure 5 in page 8, for the simulated conditions, the change in sign for the drag may only occur below a height of approximately 2 times the average particle diameter. However, on average, this does not occur in the simulations because the surface processes of rebound and splash are computed as soon as the particles are at a height lower than 4 times the average particle diameter. In this way, the statement to whom this comment is concerned was deleted from the text. As mentioned in 1.610-612, the feedback of the particles on the flow momentum is taken into account by the addition of a reaction force in the filtered Navier-Stokes equations, which is equal in magnitude and opposite to the aerodynamic drag applied to the particles. Therefore, if a particle is eventually faster than the surrounding wind velocity, it will experience a negative drag force, which is taken into account in the momentum equations as a positive source term. Nevertheless, these body forces on the momentum equations are generally negative (sink terms) and lead to an overall reduction of the wind velocity. As discussed in the reply to comment on Figure 5 (page 8), when considering a constant roughness length, a smaller near surface wind velocity implies a lower surface friction velocity  $u^*,s$ . This was made clear in the manuscript when discussing Figure 7 (1.755-758).



Regarding  $u_*$ , it is defined in the text as the friction velocity outside the saltation layer,  $u_* = \sqrt{(\tau/\rho_a)}$ , where  $\tau$  is the shear stress outside the saltation layer (equal to the surface shear stress,  $\tau_s$ , only in the absence of saltating particles) and  $\rho_a$  is the air density. As previously mentioned, this was made more clear in the text (l.135-136). In a half-channel flow without saltating particles, the fluid shear stress depends only on the imposed pressure gradient and on the height of the channel (l.604-605). Therefore,  $u_*$  does not vary with the surface roughness. As described in Bagnold (1941, page 53-55), changes in the roughness length modify the magnitude of the wind velocity, but not the shear stress profile, and therefore, the value of  $u_*$ . During saltation, Owen (1964) hypothesized that “the saltation layer behaves, so far as the flow outside it is concerned, as an aerodynamic roughness whose height is proportional to the thickness of the layer”. Therefore, outside the saltation layer, similar values of  $u_*$  will be obtained with or without particles in saltation. The feedback of the particles on the flow decreases the streamwise wind velocity, but does not modify the shear stress outside the saltation layer.

*L732-733: What do you mean perturbed? How was this set of trajectories filtered? It sounds like you may be intentionally neglecting the impact of wall-normal winds and trying to only focus on ballistic-like?*

In the analysis presented in the manuscript, we have neglected saltating particles whose trajectory exhibited at least one local minimum far away from the surface (above 1 cm height). The goal was indeed to only consider trajectories that did not deviate considerably from classic ballistic ones because the hop height is expected to be a stronger function of the vertical ejection velocity in these cases. However, taking into account that we compare the average hop height with the average vertical ejection velocity considering all particles in saltation (and not only those that follow ballistic trajectories), we now recognize that this is not ideal. Therefore, we have modified the post-processing of the results and updated Figure 8b. In the current version, we have defined a particle hop as a fraction of a particle trajectory limited by two consecutive local minimums located close to the surface. The hop height is given by the maximum height attained by the particle between these two local minimums. This is currently explained in the text (l.810-811). Higher values of average hop height are obtained with the new post-processing, but similar conclusions are obtained. Slight changes were made in the text regarding the interpretation of the results (l.817-838).

L735-736: *The particles never reach the surface? Does the wind field extend all the way to the surface?*

As mentioned in the manuscript (l.814-816), in the model, the surface processes of rebound and splash are computed as soon as the particles reach a height lower than 4 times the average grain diameter (0.14 cm in this case). Therefore, the particles are assumed to rebound or deposit before reaching  $z = 0$  m.

Regarding the wind field, the first grid point of the Eulerian mesh is placed at 5 mm above the surface. Below this height, the wind velocity in the horizontal direction is assumed to follow a logarithmic profile. This is now specified in the text when discussing the wind velocity profile (l.755-756).

*Figure 9: In the splash-dominated saltation regime, it appears the saltation height is constant with variations in  $u^*$ , and with constant mean particle velocity, correct? Then, researchers that are studying blowing snow in highly-unsteady wind should always measure the same snow particle velocities near the surface, as long as the windspeeds stay above the threshold and are averaged for 100 seconds? This seems like an unphysical conclusion to come to as there is no upper limit on wind speeds at the snow surface above the splash-dominated threshold, but you are imposing a clear upper limit on particle speeds. As well, would the height of the saltation layer not actually decrease with increasing windspeed as near-surface wind fluctuations (and fast particles) lead to quick suspension? This seems like a highly relevant question, especially for polar (and even high mountain regions) where 100km windspeeds are easily attained and shape the landscape.*

Yes, in the splash-dominated saltation regime, both the near-surface particle velocity and the saltation layer height are expected to be invariant with respect to  $u^*$ . This result is not only based on the current numerical simulations, but also on the wind tunnel measurements of particle velocity of Creyssels et al. (2009) and Ho et al. (2011) developed with sand for  $u^*$  varying from 0.24 to 0.67 m s<sup>-1</sup> and from 0.42 to 1 m s<sup>-1</sup>, respectively, the field measurements of Aksamit and Pomeroy (2016) of particle velocity over fresh snow ( $u^*=0.21-0.35$  m s<sup>-1</sup>) and old snow ( $u^*=0.24-0.54$  m s<sup>-1</sup>), and the numerical results of Ungar and Haff (1987), Kok and Renno (2009), and Durán et al. (2011). As long as the wind profiles form a focus point, there will be an upper limit for the wind speed close to the surface as  $u^*$  increases. However, we agree that the presented dynamics might not represent high wind velocity conditions in the field, where the size of the turbulent eddies is larger than the size of those obtained in wind tunnels with a height of O(1) m and simulated in a half-channel with a height of O(1-10) m. These large eddies will enhance the entrainment of particles in suspension and,

perhaps, limit or suppress the motion of particles in saltation. The situation described goes beyond what the current model is able to simulate and what the existing wind tunnel and field measurements were able to assess. This is now acknowledged in the text (1.866-871).

### **References not mentioned in the Track-changes:**

Dyunin, A. K. (1967), Fundamentals of the mechanics of snow storms, in *Physics of Snow and Ice: proceedings*, pp. 1065–1073.

Lee, L. W., and L. Wah (1975), *Sublimation of Snow In Turbulent Atmosphere*, PhD Dissertation, Department of Mechanical Engineering, University of Wyoming.

Dyunin, A. K., Anfilofiyev, B. A., Istrapilovich, M. G., Mamayeva, N. T. and Kvon, Y. D.: Strong Snow-Storms, their Effect on Snow Cover and Snow Accumulation, *J. Glaciol.*, 19(81), 441–449, 1977.

Dyunin, A. K., and V. Kotlyakov (1980), Redistribution of snow in the mountains under the effect of heavy snow-storms, *Cold Reg. Sci. Technol.*, 3, 287–294.

Schmidt, R. A.: Properties of blowing snow (1982), *Rev. Geophys.*, 20(1), 39–44.

Pomeroy, J. W., D. M. Gray, and P. G. Landine (1993), The Prairie Blowing Snow Model :characteristics, validation, operation, *J. Hydrol.*, 144, 165–192.

Gauer, P. (1998), Blowing and drifting snow in Alpine terrain: numerical simulation and related field measurements, *Ann. Glaciol.*, 26, 174–178.

Gauer, P. (2001), Numerical modeling of blowing and drifting snow in Alpine terrain, *Journal of Glaciology*, 47 (156), pp.97-110.

Maxey, M., and J. Riley, 1983: Equations of motion for a small rigid sphere in a nonuniform flow. *Phys. Fluids*, 26, 883–889, [https:// doi.org/10.1063/1.864230](https://doi.org/10.1063/1.864230).

Talaei, A. and Garrett, T. J.: On the Maxey-Riley equation of motion and its extension to high Reynolds numbers, , 1–19 [online] Available from: <http://arxiv.org/abs/2006.16577>, 2020.

Bintanja, R. (2000), Snowdrift suspension and atmospheric turbulence. Part I: Theoretical background and model description, *Boundary-layer Meteorol.*, 95, 343–368.

Budd, W. F., Dingle, W. R. J. and Radok, U. (1966): *The Byrd Snow Drift Project: Outline and Basic Results*, pp. 71–134.

Schlichting, H., and Gersten, K. (2017): *Boundary-Layer Theory*, Springer (9<sup>th</sup> edition)

# Understanding snow saltation parameterizations: lessons from theory, experiments and numerical simulations

Daniela Brito Melo<sup>1,2</sup>, Armin Sigmund<sup>1</sup>, and Michael Lehning<sup>1,2</sup>

<sup>1</sup>School of Architecture, Civil and Environmental Engineering, Ecole Polytechnique Fédérale de Lausanne, Lausanne, Switzerland

<sup>2</sup>WSL Institute of Snow and Avalanche Research SLF, Davos, Switzerland

**Correspondence:** Daniela Brito Melo (daniela.britomelo@epfl.ch)

**Abstract.** Drifting and blowing snow are important features in polar and high mountain regions. They control the surface mass balance in windy conditions and influence sublimation of snow and ice surfaces. Despite their importance, model representations in weather and climate assessments have high uncertainties because the associated physical processes are complex and highly variable in space and time. This contribution investigates the saltation system, which is the lower boundary condition for drifting and blowing snow models. Using a combination of (previous) measurements and new physics-based modeling with Large Eddy Simulations (LES), we show that the prevailing parameterizations that describe the saltation system in atmospheric models are based on contradictory assumptions: while some scaling laws are typical of a saltation system dominated by aerodynamic entrainment, others represent a saltation system controlled by splash. We show that both regimes can exist, depending on the friction velocity. Contrary to sand saltation, aerodynamic entrainment of surface particles is not negligible. It is important at low wind speeds, leading to a saltation height and near surface particle velocity which increase with the friction velocity. In a splash dominated saltation regime at higher friction velocities, the saltation height and near surface particle velocity become invariant with the friction velocity and closer to what is observed with sand. These findings are accompanied by a detailed description of the theoretical, experimental and numerical arguments behind snow saltation parameterizations. This work offers a comprehensive understanding of the snow saltation system and its scaling laws, useful for both modelers and experimentalists.

## 1 Introduction

The aeolian or wind-driven transport of snow is common in snow covered regions, in particular in high mountain areas, the Arctic and the Antarctic. This phenomenon, generally named drifting or blowing snow, occurs when the wind velocity is sufficiently high to lift the snow particles from the surface. During snow transport events, the wind flow erodes the snowpack in the most exposed regions and leads to snow re-deposition in sheltered areas. Therefore, the formation of bedforms, like dunes and ripples such as dunes, ripples, and sastrugi (Filhol and Sturm, 2015), as well as cornices at the leeward side of mountain crests (Hancock et al., 2020; Yu et al., 2022), are often observed. Snow sublimation is enhanced because the snow particles aloft are more exposed to the dry air flow (Liston and Sturm, 2004; Déry et al., 1998; Dai and Huang, 2014). In addition, some regions of the snow cover become harder and denser due to the deposition of snow particles that were previously aloft

25 (Sommer et al., 2018). The influence of the aeolian transport of snow on the mass and energy balances of the snow cover is therefore evident: it leads to snow redistribution, enhances the mass loss due to sublimation and modifies the near surface flow, temperature and moisture fields (Mott et al., 2018).

The terms drifting and blowing snow are commonly used to distinguish between weak and strong snow transport events. During drifting snow events, it is generally assumed that the snow particles do not rise above 2 m height above the ground, while during blowing snow events the snow grains are expected to reach higher regions of the atmosphere (Li and Pomeroy, 1997; Lenaerts et al., 2012). Nevertheless, in order to simplify the nomenclature, the term drifting snow is preferred throughout the text to designate snow transport events. The term drifting snow commonly refers to the aeolian transport of snow in the first 2 m above the ground, while stronger events, with snow grains reaching higher regions of the atmosphere, are named blowing snow. To simplify the nomenclature, in this work, we designate all snow transport events by drifting snow, independently of their intensity. These events are very frequent in Antarctica, specifically in the coastal areas, which are subjected to strong katabatic winds throughout the year (Lenaerts et al., 2012; Palm et al., 2017). Drifting snow sublimation is also maximum along the coast due to the higher temperatures and lower values of relative humidity in comparison with the Antarctic plateau (Gallée, 1998; Palm et al., 2017; Gerber et al., 2023). On average, the Antarctic surface mass balance is controlled by snowfall, but snow sublimation is the main mass ablation process (Lenaerts et al., 2012; Palm et al., 2017; Gerber et al., 2023). In some regions of East Antarctica, like the Neumayer station and Adélie Land, drifting snow sublimation removes approximately 17 % and 19 % of the snowfall, respectively (van den Broeke et al., 2010; Lenaerts and van den Broeke, 2012). At local scales, snow erosion and redistribution considerably influence the snow height variability, which hinders the assessment of snowfall from direct snow height observations (Mott and Lehning, 2010).

Despite its importance, the contribution of drifting snow transport and sublimation to the surface mass balance of Antarctica and other snow covered regions on Earth is still challenging to predict. For example, while the regional atmospheric model RACMO (van Wessem et al., 2018) estimates a total of  $102 \pm 5 \text{ Gt y}^{-1}$  of drifting snow sublimation over the Antarctic continent (except the Antarctic Peninsula), the amount of drifting snow sublimation derived from satellite observations (Palm et al., 2017) over the Antarctic continent (except the region south of the  $82^\circ\text{S}$  parallel) yielded  $393 \pm 196 \text{ Gt y}^{-1}$ . The estimates of drifting snow transport and sublimation obtained with models and measurements often disagree, which highlights the need to improve the drifting snow formulations implemented in atmospheric models.

50 The motion of drifting snow particles is generally conceptualized in three modes: creep, saltation and suspension (Bagnold, 1941). Creep corresponds to the rolling and sliding of snow particles, or to small hops with a maximum height of approximately the particle diameter. Saltation defines the ballistic motion of snow particles close to the surface, with a maximum height of no more than 10 to 15 cm (Gordon et al., 2009). These particles are either lifted by the turbulent flow (aerodynamic entrainment) or ejected by an impacting snow particle (splash). After impacting the surface, the saltating particles might deposit or bounce-off into a new trajectory (rebound). This region close to the surface where most particles are transported in saltation is named the saltation layer. Suspension is the motion of small snow particles that travel without regular contact with the surface that resulted from particle fragmentation upon impact with the surface (Comola et al., 2017). These particles are advected by the wind for long distances and up to high regions of the boundary layer.

The general approach in atmospheric and snow models is to parameterize the snow particle concentration and mass flux in the saltation layer and to compute the spatial and temporal distribution of snow particles in suspension, by taking into account particle advection, settling and turbulent diffusion (Lehning et al., 2008; Vionnet et al., 2014; van Wessem et al., 2018; Amory et al., 2021; Sharma et al., 2023). The bottom boundary of the snow suspension scheme is defined at the top of the saltation layer, where particle concentration is specified as a function of the near surface wind velocity and some snow surface characteristics. The contribution of creep to the mass flux of snow particles is either neglected or assumed to be included in the snow saltation parameterization. Snow sublimation is estimated with the model of Thorpe and Mason (1966) (Groot Zwaaftink et al., 2011; Lenaerts et al., 2012; Vionnet et al., 2014; Sharma et al., 2023) or with the one proposed by Lin et al. (1983) (Amory et al., 2021). The process of snow sublimation extracts heat and adds moisture from/to the near surface flow, which is generally taken into account in the energy and moisture budgets of the near surface atmosphere.

Shortcomings in the modeled drifting snow mass flux and sublimation can be related to uncertainties in the input parameters, as the near surface wind velocity, which greatly depends on the description of the surface topography (Raderschall et al., 2008; Mott and Lehning, 2010; Lenaerts et al., 2012), or to inaccuracies in the drifting snow scheme itself. In fact, and concerning the latter, it seems that the resultant quantities of interest are significantly sensitive to the snow saltation parameterizations applied. For instance, using the atmospheric model MAR, Amory et al. (2021) obtained an improved agreement between the simulated and measured drifting snow mass fluxes at D47 (Adélie Land, Antarctica) mainly by adjusting the fluid threshold,  $\tau_{ft}$  [Pa], defined as the minimum shear stress exerted by the flow that leads to the onset of to-start snow drift. Another example can be given, this time with the atmospheric model RACMO: van Wessem et al. (2018) reduced the computed drifting snow sublimation over the Antarctic continent (except the Antarctic Peninsula) from  $181 \pm 9 \text{ Gt y}^{-1}$  to  $102 \pm 5 \text{ Gt y}^{-1}$  by halving the snow particle concentration at the top of the saltation layer. ~~The fluid threshold, discussed in the first example, has the ability to vary the frequency of drifting snow events. The particle concentration at the top of the saltation layer, mentioned in the second example, affects the total mass of particles in suspension and, therefore, the rate of drifting snow sublimation.~~ The parameters discussed in these two examples influence the frequency of drifting snow events and the total mass flow rate of particles in suspension. Moreover, they significantly affect the rate of blowing snow sublimation.

As discussed above, a rigorous description of snow saltation in atmospheric models is of the utmost importance. Unfortunately, too little attention has been given to its development. The early model of Pomeroy and Gray (1990) has been used in the drifting snow schemes of RACMO (Lenaerts et al., 2012; van Wessem et al., 2018) and MAR (Amory et al., 2015, 2021). However, this saltation model is based on poorly constrained parameters and the highly simplified assumption that the vertically-averaged mass flux in saltation is well approximated by a point measurement inside the saltation layer. Vionnet et al. (2014) considered a different set of parameterizations in the atmospheric model Meso-NH. In particular, the vertical profile of particle mass flux in saltation is approximated by an exponential equation, as a function of the transport rate and a decay parameter, which we denote decay height. This formulation was also adopted by Sharma et al. (2023) when coupling the mesoscale atmospheric model WRF (Skamarock et al., 2008) with a drifting snow scheme and the snow model SNOWPACK (Bartelt and Lehning, 2002). The exponential decay of the mass flux in saltation with increasing height above the surface is a well known feature of the saltation system (e.g., Sugiura et al., 1998; Nishimura and Nemoto, 2005; Kok and Renno, 2009; Martin and Kok,

2017). However, the calculation of the transport rate and the decay height is still a challenge. Several expressions have been proposed, but there is still no full consensus on how these quantities vary with the wind field and the snow cover characteristics.

In this work, we revisit the different snow saltation parameterizations available in the literature and their use in atmospheric models. In particular, we focus on the theoretical, experimental and numerical arguments that support them (Sect. 2). We highlight where consensus and disagreement exist in order to help the reader develop a critical view on the currently used snow saltation parameterizations. By pinpointing where most of the uncertainty lies, this exposition also seeks to motivate further studies in the field. In addition, we use a numerical model to investigate some aspects of the saltation system that are not yet fully understood (Sect. 3). The numerical model computes the particle trajectories in a turbulent flow by means of a Large Eddy Simulations flow solver coupled with a Lagrangian stochastic model (LES-LSM) (Sharma et al., 2018; Comola et al., 2019b; Sigmund et al., 2022; Melo et al., 2022). The transport rate and the vertical profiles of particle mass flux and velocity are investigated, as well as the particle hop height and length during saltation. Special focus is given to the decay height and to its relation to the saltation dynamics. In Sect. 4, we summarize the main results and give suggestions for future work.

## 2 Snow saltation parameterizations

In this section, the different snow saltation parameterizations available in the literature and their use in atmospheric models are presented and discussed. We focus on the most common approximations within the steady state framework and highlight the evidence that support them. After an introduction about the steady state assumption (Sect. 2.1), the parameterizations used to compute the transport rate (Sect. 2.2) and the vertical profiles of particle concentration, streamwise velocity and mass flux (Sect. 2.3) are analyzed. These quantities are needed to compute the particle concentration at the top of the saltation layer - the lower boundary condition for the advection and diffusion of suspended particles (Lehning et al., 2008; Vionnet et al., 2014; van Wessem et al., 2018; Amory et al., 2021; Sharma et al., 2023). The effect of the wind velocity on the different quantities of interest is particularly discussed. The saltation dynamics is also highly dependent on the granular bed characteristics, which is of particular importance in the study of snow saltation (Comola and Lehning, 2017). However, considerably less literature is available on this topic.

### 2.1 The steady state assumption

Let us denote by  $x$  [m],  $y$  [m] and  $z$  [m] the streamwise, crosswise and vertical directions, respectively, in a Cartesian coordinate system. In this reference frame, we consider a turbulent air flow driven by a constant streamwise pressure gradient over a flat, homogeneous and erodible surface. It is assumed that the wind field is statistically steady and that the time-averaged wind velocity does not vary along the streamwise and crosswise directions. ~~, mainly aligned with the streamwise direction and statistically invariant along the horizontal directions.~~ Under these conditions, ~~In this framework,~~ the saltation system is considered statistically steady and invariant along the horizontal directions (steady state saltation).

Close to the surface and in the absence of saltating particles, the fluid shear stress ~~,  $\tau = \rho_a u_*^2$  [Pa],~~ can be assumed constant in height ~~, where  $\rho_a$  [kg m<sup>-3</sup>] is the air density and  $u_*$  [m s<sup>-1</sup>] is the friction velocity~~ (Prandtl, 1935). This region is generally named the inner

layer. In the atmospheric boundary layer, this constant shear stress assumption is approximately valid in the first 10 % of the boundary layer depth. In geophysical flows, this region is called the surface layer and has a thickness of 10-100 m (Stull, 1988). When the surface is aerodynamically smooth, this near surface region is conceptualized in three sublayers: a viscous sublayer in the vicinity of the surface, a logarithmic sublayer in the upper region, and a buffer sublayer in between. When the surface is fully rough (which is frequently the case in atmospheric boundary layer flows), the viscous sublayer is disrupted by the roughness features (Monin, 1970). In this case, the constant shear stress region is better described by two sublayers: the roughness sublayer and the logarithmic sublayer (Jiménez, 2004). In the latter, the turbulent shear stresses (often denoted Reynolds stresses) are dominant in comparison to those of viscous origin. In addition, under neutral stability conditions, the average streamwise wind velocity is expected to follow a logarithmic profile, which is a function of the friction velocity,  $u_*$  [ $\text{m s}^{-1}$ ], and of the roughness length,  $z_o$  [m], which characterizes the roughness of the surface. In this way, the fluid shear stress in the logarithmic sublayer,  $\tau = \rho_a u_*^2$  [Pa], where  $\rho_a$  [ $\text{kg m}^{-3}$ ] is the air density, can be computed from the covariance of the velocity fluctuations or estimated by fitting the vertical profile of average streamwise wind velocity to a logarithmic function. Under the constant shear stress assumption, the fluid shear stress in the logarithmic sublayer is equal to the surface shear stress,  $\tau_s$  [Pa].

~~During saltation, When surface particles are entrained by the fluid flow and advected by it, there is an exchange of momentum between the fluid and the particles aloft. ~~which~~ This leads to a decrease in the fluid shear stress in the saltation layer (Owen, 1964; Raupach, 1991). Above the saltation layer and within the logarithmic sublayer, the fluid shear stress is still well approximated by  $\tau$  and the streamwise wind velocity profile is still expected to follow a logarithmic trend. However, this logarithmic profile is no longer a function of  $z_o$ , but of an equivalent roughness length, greater than  $z_o$ , which takes into account the momentum deficit in the saltation layer (Bagnold, 1941; Owen, 1964). ~~however, at the surface, it reaches a smaller value denoted by~~  $\tau_s = \rho_a u_{*,s}^2$  [Pa], where  $u_{*,s}$  [ $\text{m s}^{-1}$ ] is the surface friction velocity. At the surface, the shear stress reaches a value smaller than  $\tau$ , which is given by  $\tau_s = \rho_a u_{*,s}^2$ , where  $u_{*,s}$  [ $\text{m s}^{-1}$ ] is the surface friction velocity.~~

~~The assumption of steady state saltation implies zero~~ During steady state saltation, the net erosion and deposition of particles from/on the granular bed is equal to zero. In this way, for a given friction velocity ~~outside the saltation layer (henceforth, friction velocity),  $u_*$ , (characteristic of the logarithmic region outside the saltation layer),~~ the rate at which particles are transported by the wind stays at an equilibrium value. The saltation system is therefore characterized by a self-regulatory behaviour: a local increase in the particle flow rate above its equilibrium value locally extracts more momentum from the wind, reducing its velocity; this decreases the ability of the air flow to accelerate the particles in saltation and, consequently, decreases the particle flow rate back to its equilibrium value (e.g., Bagnold, 1941; Owen, 1964).

The premises behind the steady state saltation assumption contrast with the reality of snow covered regions, which are rarely flat or homogeneous. In addition, the wind field in a mountainous terrain can seldom be characterized as statistically steady. Nevertheless, steady state saltation is frequently assumed, based on the notion that the saltation system can adapt very rapidly to changes in the wind velocity (e.g., Anderson et al., 1991). Wind tunnel and field measurements have revealed a strong coupling between the saltation system and the wind velocity fluctuations (Paterna et al., 2016; Aksamit and Pomeroy, 2018). However, atmospheric models require simple and computationally light models that cannot capture the full complexity of the wind-particle interaction. In addition, the time scales of atmospheric models do not encompass the full wind field variability.



In this context, when deriving snow saltation parameterizations for large scale models, the assumption of steady state saltation is regarded as a reasonable approximation.

When modeling the wind-particle interaction in atmospheric and snow models, the particle concentration at the top of the saltation layer is one of the most important quantities. This quantity defines the lower boundary condition for the advection and diffusion of suspended particles (Lehning et al., 2008; Vionnet et al., 2014; van Wessem et al., 2018; Amory et al., 2021; Sharma et al., 2023). It is computed from the vertical profile of particle concentration in the saltation layer, which is a function of the transport rate and of the vertical profiles of particle mass flux and streamwise velocity. In the next sections, we describe how these quantities can be computed, the most common approximations within the steady state framework, as well as the theoretical, numerical and experimental arguments that support them. Special attention is given to the effect of  $u_*$  on the different quantities of interest. The saltation dynamics is also highly dependent on the granular bed characteristics, which is of particular importance in the study of snow saltation (Comola and Lehning, 2017). However, considerably less literature is available on this topic.

## 2.2 The transport rate

The transport rate of saltating particles,  $Q$  [ $\text{kg m}^{-1} \text{s}^{-1}$ ], corresponds to the flow rate of particles moving in saltation per unit width. From its definition,  $Q$  can be computed by multiplying the mass of particles in saltation per unit surface area by the average particle streamwise velocity.

The transport rate can also be computed as a function of the wind field characteristics by performing a balance of linear momentum in the streamwise direction to the saltating particles and to the fluid flow. Let us assume that the only force applied on a given saltating particle in the streamwise direction is the aerodynamic force (neglecting, for instance, electrostatic forces and mid-air collisions). In this case, the average aerodynamic force in the streamwise direction applied to a particle along a hop equals the average rate of change of the particle streamwise momentum,  $m(v_x^i - v_x^e)/t_p$ , where  $m$  [ $\text{kg}$ ] is the particle mass,  $v_x^i$  [ $\text{m s}^{-1}$ ] and  $v_x^e$  [ $\text{m s}^{-1}$ ] are the streamwise components of the particle velocity at impact and ejection from the surface, respectively, and  $t_p$  [ $\text{s}$ ] is the duration of the particle hop (Fig. 1a). The balance of linear momentum in the streamwise direction applied to the fluid flow is simplified by assuming steady state saltation conditions and by neglecting the pressure gradient. According to Newton's third law, the aerodynamic force applied to a particle is equal in magnitude and opposite to the force applied to the fluid. Therefore, the sum of aerodynamic forces in the streamwise direction applied to all particles in saltation per unit surface area equals the difference in shear stresses,  $\tau - \tau_s$  (Fig. 1b). From these considerations, the following expression for the transport rate can be obtained (e.g., Kok et al., 2012):

$$Q = (\tau - \tau_s) \frac{\langle v_p \rangle \langle t_p \rangle}{\langle \Delta v_{x,s} \rangle} = (\tau - \tau_s) \frac{\langle l_p \rangle}{\langle \Delta v_{x,s} \rangle} \quad (1)$$

where  $v_p$  [ $\text{m s}^{-1}$ ] is the hop-averaged particle streamwise velocity,  $\Delta v_{x,s} = v_x^i - v_x^e$  [ $\text{m s}^{-1}$ ] is the difference between the impact and ejection streamwise velocities, and  $l_p = v_p t_p$  [ $\text{m}$ ] is the particle hop length in the streamwise direction (henceforth, hop length). The angular brackets,  $\langle \rangle$ , represent averages over the ensemble of particles in saltation. Therefore,  $\langle v_p \rangle$  denotes the average particle streamwise velocity.

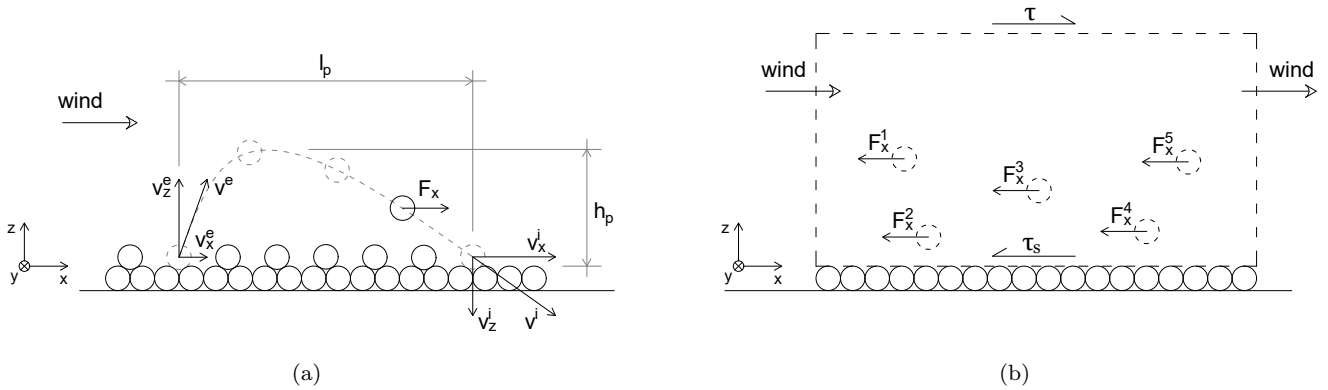

**Figure 1.** (a) Schematic of a particle hop: representation of the particle hop height and length, the instantaneous aerodynamic force in the streamwise direction applied to a particle,  $F_x$  [N], and the particle ejection and impact velocities,  $v^e$  [ $\text{m s}^{-1}$ ] and  $v^i$  [ $\text{m s}^{-1}$ ] (please note that the ejection and impact velocities often have a crosswise component which is not represented in the figure). (b) Forces and stresses applied to the fluid flow in the streamwise direction in a given control volume spanning from the surface to a height above the saltation layer (only five particles are illustrated as an example).

The variety of parameterizations proposed for  $Q$  arise from different expressions for  $\tau_s$ ,  $\langle \Delta v_{x,s} \rangle$  and  $\langle l_p \rangle$  (e.g., Bagnold, 1941; Ungar and Haff, 1987; Pomeroy and Gray, 1990; Sørensen, 1991; Kok et al., 2012). These quantities are discussed in the next subsections.

## 195 2.2.1 The surface shear stress

The onset of saltation occurs when the surface shear stress grows above a given threshold, which allows the aerodynamic entrainment of surface particles to take place (Bagnold, 1941). This threshold shear stress is named the fluid threshold,  $\tau_{ft}$  [Pa]. By definition,  $\tau_{ft} = \rho_a u_{*,ft}^2$ , where  $u_{*,ft}$  [ $\text{m s}^{-1}$ ] is the fluid threshold friction velocity. Owen (1964) was the first to suggest that the surface shear stress,  $\tau_s$ , remains invariant with respect to  $u_*$  during steady state saltation. According to Owen (1964), during steady state saltation, the particles are continuously set in motion by aerodynamic entrainment and the particle bombardment at the surface is only responsible for dislodging or loosening the grains. Naturally, he claims that saltation can only be sustained if  $\tau_s$  is equal or greater than a minimum value that allows the entrainment of loose grains, previously dislodged by impacting particles. Owen (1964) He goes one step further and hypothesizes that the surface shear stress stays at this minimum value at which saltation is sustained (Owen's hypothesis): if  $\tau_s$  is lower than this threshold no aerodynamic entrainment of previously dislodged particles surface particles occurs; and if it is larger than that threshold more particles are entrained which ultimately restores  $\tau_s$  to its original value. According to Owen, the minimum surface shear stress required to sustain saltation is equal to the impact threshold,  $\tau_{it} = \rho_a u_{*,it}^2$  [Pa]: the lower fluid shear stress outside the saltation layer for which saltating particles maintain a steady state motion (Bagnold, 1941).  $u_{*,it}$  [ $\text{m s}^{-1}$ ] is the impact threshold friction velocity. Due to the contribution of the impacting particles to dislodging the grains, Owen (1964) expects the The impact threshold is expected to be smaller than

210 the fluid threshold. Indeed, Bagnold (1941) showed with wind tunnel experiments developed with sand that the shear stress needed to keep saltating particles in motion is smaller than that required to initiate saltation from rest. In his experiments, the shear stress was computed from fitting the wind velocity outside the saltation layer to a logarithmic function. Therefore, the reported values of shear stress are characteristic of the logarithmic sublayer. Nevertheless, at the fluid and impact thresholds, the surface shear stress and the shear stress outside the saltation layer should assume similar figures due to the low number of  
215 particles aloft and the consequent small momentum exchange between the fluid and the particles.

The experimental assessment of Owen's hypothesis is challenging because it requires implies high frequency measurements of the wind velocity close to the surface within a saltation layer (e.g., Li and McKenna Neuman, 2012). The measurements of Walter et al. (2014) of the surface shear stress during saltation revealed a slight variation of  $\tau_s$  as  $u_*$  increases. In addition, some numerical models that include a statistical description of rebound and splash obtained a significant variation of the surface  
220 shear stress with respect to  $u_*$  (Werner, 1990; Nemoto and Nishimura, 2004; Kok and Renno, 2009), while others predicted a negligible change (Niiya and Nishimura, 2017; Melo et al., 2022). Doorschot and Lehning (2002), who modeled steady state saltation with a simplified numerical model, have also obtained a slight variation of  $\tau_s$  with the rise of  $u_*$ . From the different trends obtained by measurements and models, it is clear that the self-regulatory behaviour of steady state saltation is  
225 can emerge depending on the wind and particle characteristics. In this way, Owen's hypothesis is expected to oversimplify the saltation dynamics (Kok et al., 2012). Nonetheless, the assumption that  $\tau_s$  does not vary with  $u_*$ , but depends solely on the bed characteristics, is regarded as an acceptable first order approximation (Walter et al., 2014; Niiya and Nishimura, 2022). Therefore, it might be appropriate for simple models and parameterizations, regardless of aerodynamic entrainment being considered the main entrainment process (e.g., Pomeroy and Gray, 1990; Sørensen, 1991, 2004).

230 The numerical model of Kok and Renno (2009) has revealed an increase of  $\tau_s$  with the increase of the particle diameter in the granular bed (see Fig. 13 in Kok et al., 2012). The same is found by Melo et al. (2022) when considering uniformly-sized particles. In the latter, it is seen that other characteristics of the granular bed, as the particle size distribution and the existence of cohesive bonds between the particles, also influence the value of  $\tau_s$  during steady state saltation.

In the drifting snow schemes of the atmospheric models RACMO, MAR, Meso-NH and CRYOWRF (Lenaerts et al., 2012;  
235 Amory et al., 2021; Vionnet et al., 2014; Sharma et al., 2023),  $\tau_s$  is assumed invariant with respect to  $u_*$  and approximated by the fluid threshold,  $\tau_{ft} = \rho_a u_{*,ft}^2$ , where  $u_{*,ft} [m s^{-1}]$  is the fluid threshold friction velocity. The assumption that  $\tau_s = \tau_{ft}$  is partly based on the model proposed by Owen (1964). However, it neglects the effect of particle impacts in dislodging the grains that justifies Owen's claim that  $\tau_s$  must be smaller than  $\tau_{ft}$ , which assumes  $\tau_s$  to be equal to  $\tau_{ft}$  and, therefore, a fraction of  $\tau_{ft}$ . The  
240 assumption that  $\tau_s = \tau_{ft}$  also implies that the fluid shear stresses for saltation initiation and cessation are equal, which is a useful assumption (note that Eq. 1 reduces to zero when  $\tau$  equals  $\tau_s$ ). However, it is not in agreement with wind tunnel measurements nor saltation models developed for sand (e.g., Bagnold, 1941; Kok et al., 2012). For the case of snow saltation, the relationship between  $\tau_s$  and  $\tau_{ft}$  is still not clear. While some numerical models predict  $\tau_s > \tau_{ft}$  (Nemoto and Nishimura, 2004; Melo et al., 2022), other predicts  $\tau_s < \tau_{ft}$  (Niiya and Nishimura, 2017). Both trends are found with the model of Doorschot and Lehning (2002) depending on the characteristics of the snow cover. In this way, further investigation is needed to better

**Table 1.** [The different shear stresses, their definitions, and particular cases within the steady state assumption.](#)

| Concept                                                                               | Symbol                        | Particular cases                                                                                                                     |
|---------------------------------------------------------------------------------------|-------------------------------|--------------------------------------------------------------------------------------------------------------------------------------|
| Shear stress in the logarithmic sublayer                                              | $\tau = \rho u_*^2$           |                                                                                                                                      |
| Surface shear stress                                                                  | $\tau_s = \rho u_{*,s}^2$     | No particles aloft: $\tau_s = \tau$<br>Owen's hypothesis: $\tau_s = \tau_{it}$<br>Common in atmospheric models: $\tau_s = \tau_{ft}$ |
| Fluid threshold: lowest shear stress at which saltation starts                        | $\tau_{ft} = \rho u_{*,ft}^2$ | At the fluid threshold: $\tau = \tau_s = \tau_{ft}$                                                                                  |
| Impact threshold: lowest shear stress at which saltation is maintained <sup>(1)</sup> | $\tau_{it} = \rho u_{*,it}^2$ | At the impact threshold: $\tau = \tau_s = \tau_{it}$                                                                                 |

<sup>(1)</sup>Some authors define the impact threshold as the minimum surface shear stress for which saltation is sustained by splash (Comola et al., 2021). This definition of  $\tau_{it}$  will be considered in Sect. 3.3.

245 assess the value of  $\tau_s$  during snow saltation and the impact of the currently used assumption on the accuracy of the transport  
rate. [A summary of the different shear stresses defined in this work and the main assumptions regarding the surface shear stress  
are presented in Table 1.](#)

## 2.2.2 The ejection and impact velocities

When assessing the transport rate, Bagnold (1941) assumed that the ratio  $\langle l_p \rangle / \langle \Delta v_{x,s} \rangle$  scales with  $\langle v_z^e \rangle / g$ , where  $v_z^e$  [m s<sup>-1</sup>] is  
250 the vertical component of the ejection velocity and  $g$  [m s<sup>-2</sup>] is the acceleration of gravity. One arrives to this result by solving  
the ballistic motion of a particle in saltation subjected to some simplifying assumptions (see for instance, Sørensen, 1991). In  
addition, Bagnold (1941) assumed that  $\langle v_z^e \rangle$  is proportional to  $u_*$ , based on the idea that the particle velocity at impact must  
scale with  $u_*$  (please note that  $u_*$  is the friction velocity outside the saltation layer and not the surface friction velocity, which  
is defined by  $u_{*,s}$ ).

255 Numerical models, like the one proposed by Ungar and Haff (1987), generally suggest that  $\langle \Delta v_{x,s} \rangle$  is invariant with respect  
to  $u_*$ . Ungar and Haff (1987) arrived to this result by assuming that in steady state saltation each particle impacting the surface  
is replaced by a new one, equal in size, splashed from the surface upon impact. Indeed, during steady state saltation, zero net  
erosion and deposition of particles implies an equality between the mass rate of particles that fail to rebound and the mass  
rate of particles that successfully enter saltation via splash or aerodynamic entrainment (Kok et al., 2012). Contrary to Owen  
260 (1964), most numerical models assume that the surface processes of rebound and splash play an important role in steady state  
saltation (e.g., Kok and Renno, 2009; Durán et al., 2011). These models compute the probability of rebound and the number  
and initial velocity of splashed grains as a function of the bed characteristics and the impacting particle mass and velocity.  
They also [As a result, they](#) predict that  $\langle \Delta v_{x,s} \rangle$  does not vary with  $u_*$ . This assumption is equally present in the analytic model  
of Sørensen (2004), which is used in Meso-NH (Vionnet et al., 2014) and CRYOWRF (Sharma et al., 2023) to compute the  
265 transport rate. In addition, numerical models of snow saltation that represent the surface processes of aerodynamic entrainment,

rebound and splash have also revealed ejection and impact velocities that are mainly invariant with respect to  $u_*$  (Melo et al., 2022; Niiya and Nishimura, 2022).

Field and wind tunnel measurements conducted with sand show a negligible influence of  $u_*$  on the near surface particle velocity. For instance, Namikas (2003) found a better agreement between model results and field measurements of particle mass flux when assuming an averaged ejection velocity invariant with respect to  $u_*$  for friction velocities ranging from 0.27 to 0.63  $\text{m s}^{-1}$ . Moreover, wind tunnel experiments developed by Creyssels et al. (2009) and Ho et al. (2011) over an erodible sand surface show a negligible variation of the particle streamwise velocity close to the surface with respect to  $u_*$ , considering friction velocities ranging from 0.24 to 0.67  $\text{m s}^{-1}$  and from 0.42 to 1  $\text{m s}^{-1}$ , respectively. During the experiments, the particles were illuminated by a laser sheet and recorded with a high-speed camera. The particle velocities were calculated with the Particle Tracking Velocimetry (PTV) technique and the particle streamwise velocity close to the surface was extrapolated from a linear regression of the average streamwise velocity profiles in the first 5 and 3 cm above the surface, respectively. The particle streamwise velocity close to the surface is named slip velocity and represents the average between the ejection and impact streamwise velocities.

The streamwise velocity of saltating snow was investigated by Aksamit and Pomeroy (2016) during field experiments in Alberta, Canada, using a similar experimental setup as the one used by Creyssels et al. (2009) and Ho et al. (2011). The streamwise velocity of ascending particles in the first 2.5 cm above the surface was reported for friction velocities ranging from 0.21 to 0.54  $\text{m s}^{-1}$  for three different snow conditions (old snow, fresh snow and fine decomposing grains). The average particle ejection velocity in the streamwise direction,  $\langle v_x^e \rangle$ , was extrapolated from a linear regression of the average streamwise velocity of ascending particles along the first 1 cm above the surface. Even though steady state conditions were not fully attained during the experiments, different trends were obtained for different snow surface characteristics. For the old and fresh snow covers, the streamwise ejection velocity was not found to vary monotonically with the friction velocity, while for the one composed of fine decomposing grains, a slight increase with  $u_*$  was observed. Among the three snow surfaces, the latter was characterized by the highest hand hardness index. The increase of the streamwise ejection velocity with  $u_*$ , obtained over the surface of fine decomposing grains, is in agreement with the increase of the particle slip velocity as  $u_*$  increases, obtained by Ho et al. (2011) after performing wind tunnel measurements of saltating sand over a rigid (non-erodible) surface, considering friction velocities ranging from 0.3 to 0.45  $\text{m s}^{-1}$ . Aksamit and Pomeroy (2016) obtained higher values of  $\langle v_x^e \rangle$  over the fresh snow cover than over the fine decomposing grains and old snow covers. Differently, Ho et al. (2011) obtained higher values for the particle slip velocity over the rigid surface in comparison to the erodible surface.

In summary, most of the available literature suggests that the average ejection and impact velocities are invariant with respect to  $u_*$ . However, the few experiments developed with snow reveal different trends depending on the snow surface characteristics. In order to understand the particular case of snow saltation, more experimental measurements developed with snow are required, which must include a detailed characterization of the snow cover, the wind field and the kinematics of the particles in saltation.

### 2.2.3 The hop length

300 The particle hop length,  $l_p$ , is equal to the duration of the particle hop,  $t_p$ , times the hop-averaged particle streamwise velocity,  $v_p$ . Therefore, for the ensemble of particles in saltation one considers  $\langle l_p \rangle = \langle v_p \rangle \langle t_p \rangle$ .  $\langle t_p \rangle$  is expected to deviate from the theoretical value of  $2\langle v_z^e \rangle / g$  (obtained when neglecting the aerodynamic forces in the particle motion), but it is nonetheless expected to scale with  $\langle v_z^e \rangle$  (Sørensen, 1991). In addition, as discussed in the previous section, the particle ejection velocity during steady state saltation is generally regarded as invariant with respect to  $u_*$ . Under these conditions, the scaling of  $\langle l_p \rangle$   
305 with  $u_*$  is mainly dependent on the scaling of  $\langle v_p \rangle$  with  $u_*$ . Assuming that the particle ejection velocity does not vary with  $u_*$ , the average particle streamwise velocity,  $\langle v_p \rangle$ , depends solely on the aerodynamic forces applied on the particles during their trajectories and, therefore, on the wind velocity inside the saltation layer.

Ungar and Haff (1987) concluded that  $\langle l_p \rangle$  is invariant with respect to  $u_*$  and proportional to the particle diameter,  $d$  [m]. This result is obtained by assuming that the ejection and impact velocities scale with  $(dg)^{\frac{1}{2}}$  and that the wind velocity in the  
310 saltation layer is invariant with respect to  $u_*$ . Differently, the analytic model of Sørensen (2004), used in Meso-NH (Vionnet et al., 2014) and CRYOWRF (Sharma et al., 2023), arrived to an average particle hop length proportional to  $u_*$ . In the model, the particle ejection velocity is also assumed invariant with respect to  $u_*$  and the logarithmic (particle free) wind profile is modified to take into account the reduction in fluid shear stress induced by the particles in saltation. Therefore, the wind velocity decreases in comparison to the logarithmic profile, but it is nonetheless proportional to  $u_*$  inside the saltation layer.

315 Wind tunnel measurements show that the wind velocity during saltation is expected to be invariant with respect to  $u_*$  in the first centimeter above the surface, where most saltating particles are (Bagnold, 1941; Li and McKenna Neuman, 2012). However, at higher elevations, the wind velocity is expected to scale with  $u_*$  (e.g., Nishimura et al., 2014; Aksamit and Pomeroy, 2016). Therefore, if a significant number of particles travel above 1 cm height during a significant extent of their trajectories,  $\langle v_p \rangle$  might increase as  $u_*$  increases. This is in agreement with the field experiments of Namikas (2003) developed  
320 with sand, which revealed a slight increase of the hop length with  $u_*$ .

The numerical model of Durán et al. (2011) suggests that the scaling of the hop length with the friction velocity differs according to the saltation regime. At a low-velocity regime (for, approximately,  $u_*/u_{*,it} < 4$ ), most saltating particles are within this first centimeter above the surface where the wind velocity is invariant with respect to  $u_*$ . Therefore, the average particle velocity and hop length are expected to be invariant with respect to  $u_*$ . However, at a high-velocity regime ( $u_*/u_{*,it} >$   
325 4), a considerable number of saltating particles reach higher elevations above the surface, where the wind velocity increases with  $u_*$ . Under these conditions, both the average particle streamwise velocity and hop length are expected to increase linearly with  $u_*$ . Taking into account that  $u_*/u_{*,it} > 4$  rarely occurs in nature for the case of saltating sand, Kok et al. (2012) argued that neglecting the effect of  $u_*$  on the hop length can be regarded as a reasonable approximation. If both  $\langle \Delta v_{x,s} \rangle$  and  $\langle l_p \rangle$  are assumed invariant with respect to  $u_*$ , the transport rate scales with  $u_*^2$  (note that  $\tau = \rho u_*^2$ ) (Ungar and Haff, 1987; Durán et al.,  
330 2011). Conversely, if  $\langle l_p \rangle$  increases linearly with  $u_*$ , one arrives to  $Q \propto u_*^3$  (Sørensen, 1991, 2004).

Further studies are needed in order to fully understand the scaling of  $\langle l_p \rangle$  with the friction velocity during snow saltation. In particular, it would be interesting to unveil if the two regimes proposed by Durán et al. (2011) are also representative of saltating snow. The full vertical profile of the particle streamwise velocity is discussed in Sect. 2.3.2.

#### 2.2.4 The average particle streamwise acceleration

335 The hop-averaged particle streamwise acceleration,  $a_p$  [ $\text{m s}^{-2}$ ], is given by the ratio  $\Delta v_{x,s}/t_p$ . Considering the ensemble of particles in saltation, the average particle streamwise acceleration,  $\langle a_p \rangle$ , is approximated by  $\langle \Delta v_{x,s} \rangle / \langle t_p \rangle$ . In this way, the transport rate in Eq. (1) can be expressed by

$$Q = (\tau - \tau_s) \frac{\langle v_p \rangle}{\langle a_p \rangle}. \quad (2)$$

According to the balance of linear momentum applied to the particles in saltation described in Sect. 2.2, the ratio between the  
 340 total aerodynamic force along the streamwise direction applied to all particles in saltation and their weight is given by  $\langle a_p \rangle / g$ . Bagnold (1973) argued that this ratio between the applied horizontal force and the weight of the mass in motion represents a mean friction coefficient. This friction coefficient is expected to be of a similar nature as the coefficient of static friction obtained between two solid surfaces in contact. Taking into account that the real (microscopic) contact between two surfaces is actually  
 345 discontinuous, Bagnold (1973) claims that this analogy holds for the case of saltating particles, in which the contact between the particles and the surface is intermittent. Therefore, similar to a coefficient of static friction, the ratio  $\langle a_p \rangle / g$  is expected to be a function of the particle-bed interaction only and, consequently, invariant with respect to  $u_*$ .

In the saltation model proposed by Pomeroy and Gray (1990), an expression for the transport rate of saltating snow is also obtained by estimating the ratio  $\langle a_p \rangle / g$ . However, differently from Bagnold (1973),  $\langle a_p \rangle$  was found to increase linearly with  
 350  $u_*$ . In addition, it was found to be highly variable with the snow surface characteristics. In the model,  $\langle a_p \rangle$  was not estimated from the direct measurements of  $\langle \Delta v_{x,s} \rangle$  and  $\langle t_p \rangle$ , but it was deduced from fitting experimental measurements of the particle mass flux in saltation with Eq. (2). Therefore, the resultant scaling of  $\langle a_p \rangle$  with  $u_*$  is a function of the parameterizations considered for  $\tau_s$  and  $\langle v_p \rangle$ , as well as of the accuracy of the mass flux measurements and the respective vertically integrated value,  $Q$ .

The mass flux measurements considered in the model were performed at Saskatoon, Canada, using an optoelectronic snow  
 355 particle detector placed at approximately 2 cm height above the snow surface. This device counts the number of particles crossing an infrared laser beam. The mass flux is then estimated by assuming a particle size distribution given by a two-parameters Gamma distribution, as suggested by Schmidt (1981), and a particle density equal to the density of ice ( $\sim 917 \text{ kg m}^{-3}$ ). The mass flux in saltation is assumed to be uniform in height. Therefore, the transport rate is estimated from the product of the measured mass flux and the height of the saltation layer,  $h_{salt}$  [m]. As addressed in Sect. 2.3.3, the vertical profile of the  
 360 particle mass flux exhibits strong gradients close to the surface. In this way, the saltation mass flux is hardly defined by a single point measurement and the assumption of a constant mass flux along the saltation layer might lead to errors in the assessment of the transport rate.

In summary, Pomeroy and Gray (1990) arrived to the conclusion that  $\langle a_p \rangle$  scales with  $u_*$  by assuming that the mass flux is uniform in height, that  $h_{salt}$  scales with  $u_*^2$  (Owen, 1964) and that  $\langle v_p \rangle$  is invariant with respect to  $u_*$ . As a consequence, they concluded that  $Q$  scales linearly with  $u_*$ . This result is not in agreement with most saltation models and was shown to highly underestimate the transport rate in comparison to other expressions proposed in the literature (Melo et al., 2022). Notwithstanding, this model is still widely used, specifically in the drifting snow schemes of RACMO (van Wessem et al., 2018) and MAR (Amory et al., 2021). The model of Pomeroy and Gray (1990) is one of the few parameterizations for the transport rate that take into account field measurements of snow saltation. However, it is highly dependent on the assumptions made for the particle mass flux and streamwise velocity profiles. These will be discussed in Sect. 2.3.

If both  $\langle \Delta v_{x,s} \rangle$  and  $\langle t_p \rangle$  are invariant with respect to  $u_*$ , as suggested by several models and measurements (see Sect. 2.2.2 and 2.2.3),  $\langle a_p \rangle$  is mainly expected to be invariant with respect to  $u_*$ , as early hypothesized by Bagnold (1973). Taking into account that the direct measurement of  $\langle a_p \rangle$  is challenging (e.g., Araoka and Maeno, 1981), the variation of  $Q$  with  $u_*$  and the snow surface characteristics might be better understood from the direct study of  $\langle \Delta v_{x,s} \rangle$ ,  $\langle t_p \rangle$  and  $\langle v_p \rangle$ .

### 2.3 The vertical profiles of particle concentration, streamwise velocity and mass flux

The particle mass flux in saltation,  $q$  [ $\text{kg m}^{-2} \text{s}^{-1}$ ], corresponds to the flow rate of particles moving in saltation per unit cross section area. The particle concentration,  $c$  [ $\text{kg m}^{-3}$ ], is the mass of particles in saltation per unit volume. By definition, these two quantities are related by  $q = c\bar{v}_x$ , where  $\bar{v}_x$  [ $\text{m s}^{-1}$ ] is the volume-averaged particle streamwise velocity (henceforth, particle streamwise velocity) at which the respective mass of particles in saltation travels across a given cross section area (note that the average of  $\bar{v}_x$  along the saltation layer equals the average particle streamwise velocity,  $\langle v_p \rangle$ , defined in Sect. 2.2). During steady state saltation,  $q$ ,  $c$  and  $\bar{v}_x$  are invariant along the horizontal directions, but they are expected to vary with the height above the surface. In the following subsections, we discuss the parameterizations used to model these quantities, as well as the experimental, theoretical and numerical results that contributed to their development.

#### 2.3.1 The particle concentration

An analytic expression for the vertical profile of particle concentration was derived by Kawamura (1951). In the model, the saltation dynamics is simplified by neglecting the aerodynamic forces on the vertical motion of saltating particles, by assuming that the probability distribution of the vertical component of the particle ejection velocity follows a half-normal distribution and that the saltating particles are uniformly sized. In this way, from a mass balance between the surface and a given height  $z$ , the particle concentration at each height can be estimated as a function of the probability distribution of the vertical ejection velocity and the vertical mass flux of particles leaving the surface. In Gordon et al. (2009), it is shown that the analytic expression of Kawamura (1951) is well approximated by an exponential decay of the form:

$$c(z) = c_o \exp\left(-\frac{z}{\delta_c}\right) \quad (3)$$



where  $c_o$  [ $\text{kg m}^{-3}$ ] is the particle concentration at the surface (by extrapolating the exponential profile down to the surface) and  $\delta_c$  [m] is the decay height of the particle concentration profile. The decay height,  $\delta_c$ , defines the height above the surface for which the particle concentration is reduced to  $c_o/\exp(1)$ . The theoretical expression proposed by Kawamura (1951) tends to infinity at the surface. Therefore, Eq. (3) is expected to underestimate the particle concentration near the surface and to provide a good approximation only for  $z > \langle h_p \rangle$ , where  $\langle h_p \rangle$  [m] is the average hop height of particles in saltation.

The direct measurement of the particle concentration is challenging because it requires the measurement of the number and size of saltating particles in a well defined volume (Creyssels et al., 2009). Gordon et al. (2009) measured the number density of snow particles in saltation in the first 9 cm above the surface over sea ice in Franklin Bay, Canada. Images of saltating snow were recorded with a camera, which captured the light reflected by snow particles traveling in front of a black background. The vertical profile of particle concentration was estimated by specifying the width over which the particles were detected (volume depth), by assuming that the particle size distribution is given by a two-parameters Gamma distribution and that the saltating particles have the density of ice. The resultant particle concentration profiles, obtained for friction velocities ranging from 0.25 to 0.5  $\text{m s}^{-1}$  and different snow surface conditions, followed mainly an exponential decay as predicted by the theoretical model of Kawamura (1951). However, when the particle concentration was low, the data was more scattered and deviations from the exponential decay was seen above approximately 2 cm height above the surface.

From fitting the measured vertical profiles with Eq. (3), the respective decay height was estimated. According to Gordon et al. (2009),  $\delta_c$  is expected to scale with the average hop height,  $\langle h_p \rangle$ . In the absence of aerodynamic forces, the hop height of a particle in saltation scales with  $v_z^e/g$ . Therefore,  $\delta_c$  is expected to scale with  $\langle v_z^e \rangle^2/g$ . Owen (1964) suggested that  $\langle v_z^e \rangle$  scales with  $u_*$  and, therefore, that  $\langle h_p \rangle$  scales with  $u_*^2$ . However, the measurements of Gordon et al. (2009) revealed a weak correlation between  $\delta_c$  and  $u_*^2$ . Indeed, for each set of measurements conducted on the same day (similar snow surface conditions), the decay height did not increase monotonically with the friction velocity.

Similar results were found by Creyssels et al. (2009), after performing wind tunnel experiments with uniformly-sized sand particles. As mentioned in Sect. 2.2.2, the experiments were performed with a high-speed camera illuminated by a laser sheet. The particle concentration was computed in the first 5 cm above the surface for friction velocities ranging from 0.24 to 0.67  $\text{m s}^{-1}$ . In the calculations, the volume depth was assumed equal to the width of the laser. The vertical profiles of particle concentration were found to follow an exponential decay of the form of Eq. (3) and the respective decay height was found to be invariant with respect to the friction velocity. The conclusions of Gordon et al. (2009) and Creyssels et al. (2009) regarding the scaling of  $\delta_c$  with  $u_*$  are in agreement with the assumption that the ejection velocity is invariant with respect to  $u_*$ , which is in line with most numerical models and experimental measurements developed over erodible surfaces (see Sect. 2.2.2).

Ho et al. (2011) used a similar technique to measure the particle concentration in the first 6 cm above the surface in a wind tunnel. In their experiments, both a bed composed of loose grains and a rigid (non-erodible) surface were used. In agreement with the experiments of Creyssels et al. (2009), the particle concentration over the erodible surface was found to decrease with increasing height following an exponential decay and the computed decay height was invariant with respect to  $u_*$ . Differently, when saltation was allowed to develop over the rigid surface, the decay height was found to be higher and to increase linearly with  $u_*$ . This result is related to the higher values of the particle slip velocity obtained over the rigid surface in comparison

with the erodible one and to the increase of the particle slip velocity with the increase of  $u_*$  obtained over the rigid surface, mentioned in Sect. 2.2.2.

430 Taking into account the challenges and uncertainties of the particle concentration measurements, specially in the field, measurements of the particle mass flux are more frequent (e.g., Namikas, 2003; Martin and Kok, 2017; Nishimura and Nemoto, 2005). Therefore, the general approach in drifting snow schemes is to derive the particle concentration as a function of the particle streamwise velocity and mass flux (Amory et al., 2021; van Wessem et al., 2018; Vionnet et al., 2014; Sharma et al., 2023). These two quantities are discussed in the next sections.

### 435 2.3.2 The particle streamwise velocity

The particle streamwise velocity of saltating sand was measured by Creyssels et al. (2009) and Ho et al. (2011) in the first 5 and 3 cm above the surface, respectively (see details in Sect. 2.2.2). In this region of the saltation layer, the particle streamwise velocity,  $\bar{v}_x$ , was found to increase linearly with height. Over a bed of loose sand grains, the effect of the friction velocity on the particle slip velocity was almost negligible, as discussed in Sect. 2.2.2. Above the surface,  $\bar{v}_x$  was found to increase slightly  
440 with the rise of  $u_*$ . Using also the PTV technique, Aksamit and Pomeroy (2016) measured the velocity of saltating snow in the first 2.5 cm above the surface in a snow covered area. A linear increase of  $\bar{v}_x$  with height was seen in the first 1 cm above the surface. In addition,  $\bar{v}_x$  was found to increase slightly with the friction velocity.

The particle streamwise velocity can also be measured with a Snow Particle Counter (SPC) (Nishimura et al., 2014). The SPC is an optical device that detects the particles that cross a 25 mm long, 2 mm high and 0.5 mm wide laser beam. In general,  
445 this device is used to retrieve the number and average diameter of all particles crossing the laser beam during a defined time period. Therefore, it is mainly used to estimate the particle mass flux. The particle streamwise velocity can be computed by evaluating the time that each particle takes to cross the laser beam. Nishimura et al. (2014) measured the streamwise velocity of saltating snow along the first 10 cm above the surface in a wind tunnel for friction velocities ranging from 0.37 to 0.63  $\text{m s}^{-1}$  using this technique. In agreement with the previous studies, the particle streamwise velocity was found to increase as  
450 the height above the surface and the friction velocity increase. However, differently from the previous PTV measurements, most of the measurement points were located above 5 cm height. In this way, the increase of  $\bar{v}_x$  with increasing height did not follow a linear trend, but rather a logarithmic one. Similar particle streamwise velocity profiles were found in the wind tunnel measurements performed by Nishimura and Hunt (2000), who recorded saltating snow particles and ice spheres in the first 10 cm above the surface with a video system, and by Rasmussen and Sørensen (2008), who used Laser Doppler Velocimetry  
455 (LDV) to measure the streamwise velocity of saltating sand in the first 8 cm above the surface.

Numerical models that represent the surface processes of splash and rebound have also obtained an increase of the particle streamwise velocity with height (e.g., Kok and Renno, 2009; Durán et al., 2011). As expected, in the first 1 cm above the surface, the particle velocity is mainly invariant with respect to  $u_*$  and, at higher elevations, the particle streamwise velocity increases with the increase of  $u_*$ .

460 In the model of Pomeroy and Gray (1990), the particle streamwise velocity is assumed constant in height and characterized by its average value  $\langle v_p \rangle$ .  $\langle v_p \rangle$  is assumed invariant with respect to  $u_*$  and proportional to the impact threshold friction velocity,

$u_{*,it}$ . This assumption can be found in the drifting snow schemes of RACMO, MAR, Meso-NH and CRYOWRF to compute the particle concentration at the top of the saltation layer as a function of the particle streamwise velocity and mass flux (Lenaerts et al., 2012; Amory et al., 2021; Vionnet et al., 2014; Sharma et al., 2023). The assumption that  $\langle v_p \rangle$  scales with  $u_{*,it}$  is justified by the observations of Bagnold (1941) regarding the existence of a focus point in the wind velocity profile. According to his observations, during steady state saltation, the wind velocity inside the saltation layer obtained for different values of  $u_*$  converge to the same value at a given height close to the surface - the focus point. The wind velocity at the focus point scales with the impact threshold friction velocity and is, therefore, solely dependent on the bed characteristics. In this way, the particle streamwise velocity in the vicinity of the focus point is also expected to scale with  $u_{*,it}$ , which according to Owen (1964) is the value of the surface friction velocity during saltation (see Sect. 2.2.1). The existence of a focus point and the fact that the particle streamwise velocity close to the surface is invariant with respect to  $u_*$  are known features of the saltation system, obtained by different models that represent the surface processes of rebound and splash (e.g., Kok and Renno, 2009; Durán et al., 2011; Melo et al., 2022). However, as previously discussed, experimental measurements performed with both sand and snow show that the particle streamwise velocity above approximately 3 cm height increases with the increase of  $u_*$ . In this way, the parameterization used for  $\bar{v}_x$ , in particular, its scaling with  $u_{*,it}$  and  $u_*$ , must be defined according to the height at which the particle streamwise velocity (and, subsequently, the particle concentration) is being computed.

The snow surface characteristics are also expected to influence the particle streamwise velocity, as previously discussed in Sect. 2.2.2. For instance, for the same range of friction velocities, Aksamit and Pomeroy (2016) found a higher particle streamwise velocity in the first 2.5 cm above the surface when saltation developed over a surface of fresh snow than over surfaces of old snow or fine decomposing grains. One can hypothesize that this is related to the smaller density and dendritic shape of the particles in saltation. The particles ejected from a fresh snow surface are not fully rounded and will continuously fragment and get denser as the particles collide with the bed (Comola et al., 2017). Other snow surface characteristics, like the particle diameter and the existence of cohesive bonds between the snow particles, can also influence the saltation dynamics. When modeling the impact and splash of saltating snow particles, Comola and Lehning (2017) took into account the effect of inter-particle cohesion. In their model, a fraction of the kinetic energy of the impacting particle is used to break the cohesive bonds between each ejected particle and the surrounding ones. Melo et al. (2022) used this splash model to simulate saltating snow and assessed the effect of the particle diameter and inter-particle cohesion on the particle streamwise velocity. Considering a bed of uniformly-sized particles, the particle streamwise velocity was found to decrease with the increase of the particle diameter. Moreover, by increasing the energy required to break the cohesive bonds, a decrease of the particle concentration and an increase of the particle streamwise velocity was found in the first 5 cm above the surface. In the model, the existence of inter-particle bonds leads to a decrease in the number of particles aloft. This small amount of particles are able to extract more momentum from the flow and to reach higher velocities. The same trend was found by Comola et al. (2019a) when studying the effect of inter-particle cohesion on steady state saltation, using the Discrete Element Method (DEM) and a simple description of the wind velocity field.

The vertical profile of particle mass flux is expected to follow an exponential decay of the same form of Eq. (3) (e.g., Nalpanis et al., 1993; Namikas, 2003; Martin and Kok, 2017):

$$q(z) = q_o \exp\left(-\frac{z}{\delta_q}\right) \quad (4)$$

where  $q_o$  [ $\text{kg m}^{-2} \text{s}^{-1}$ ] is the surface mass flux (by extrapolating the exponential profile down to the surface) and  $\delta_q$  [m] is the decay height of the particle mass flux profile. By definition, the integral of  $q$  along the height yields the transport rate,  $Q$ . Therefore, it follows that  $q_o = Q/\delta_q$ .

Experiments developed with sand show that the mass flux profile follows an exponential decay at moderate friction velocities, but does not at low values of  $u_*$ , close to the fluid threshold friction velocity (Nalpanis et al., 1993; Namikas, 2003). In addition, it was shown that the exponential decay tends to underestimate the mass flux in the first 2 cm above the surface (Namikas, 2003; Bauer and Davidson-Arnott, 2014). This might pose a problem when relating the fitted values of  $q_o$  and  $\delta_q$  with the transport rate,  $Q$ . Experiments developed with snow, both in wind tunnels (Sugiura et al., 1998; Sato et al., 2001) and in the field (Takeuchi, 1980; Nishimura and Nemoto, 2005), revealed an exponential decay of the mass flux profile in approximately the first 10 cm above the surface. Near the top of the saltation layer, deviations are seen due to the saltation-suspension transition (Gordon et al., 2009). The exponential decay of the particle mass flux with height contrasts with the uniform profile assumed by Pomeroy and Gray (1990), as discussed in Sect. 2.2.4.

Similarly to the decay height presented in Eq. (3),  $\delta_q$  is also thought to scale with the average particle hop height in saltation and, therefore, with  $\langle v_z^e \rangle^2/g$  (Nishimura and Hunt, 2000). Based on the assumption made by Owen (1964) regarding the scaling of  $\langle v_z^e \rangle$  with  $u_*$ , Nishimura and Hunt (2000) assumed that  $\delta_q$  must scale with  $u_*^2/g$ . This parameterization for  $\delta_q$  is currently used in Meso-NH (Vionnet et al., 2014) and CRYOWRF (Sharma et al., 2023) to compute the particle mass flux in saltation.

The decay height is estimated from fitting Eq. (4) to the measured mass flux profiles. In Fig. 2, the values of  $\delta_q$  obtained from different experiments developed with sand and snow are presented as a function of the friction velocity,  $u_*$  (Sugiura et al., 1998; Namikas, 2003; Nishimura and Nemoto, 2005; Martin and Kok, 2017). The expression proposed by Nishimura and Hunt (2000) is also presented for comparison. The measurements of Sugiura et al. (1998) were performed in a wind tunnel using preserved natural snow, which was disintegrated into individual particles prior to the experiments. The particle mass flux was measured between 1.6 and 6.1 cm above the surface using a SPC. By detecting the number and average diameter of saltating particles, the mass flux is computed by approximating the snow particles to spheres and by assuming a given particle density (generally,  $917 \text{ kg m}^{-3}$ ). As seen in Fig. 2, the values of  $\delta_q$  obtained for friction velocities ranging from 0.15 to  $0.39 \text{ m s}^{-1}$  were found to increase with  $u_*^2$ , as suggested by Nishimura and Hunt (2000).

The results of Sugiura et al. (1998) are in agreement with the wind tunnel experiments of Sato et al. (2001) performed with two different snow covers. Similarly to the experiments of Sugiura et al. (1998), snow particles were obtained by disintegrating a layer of preserved natural snow. Experiments were performed immediately after spreading the snow particles over the wind tunnel floor (loose snow cover) and after some time, which allowed sintering to take place (hard snow cover). The vertical

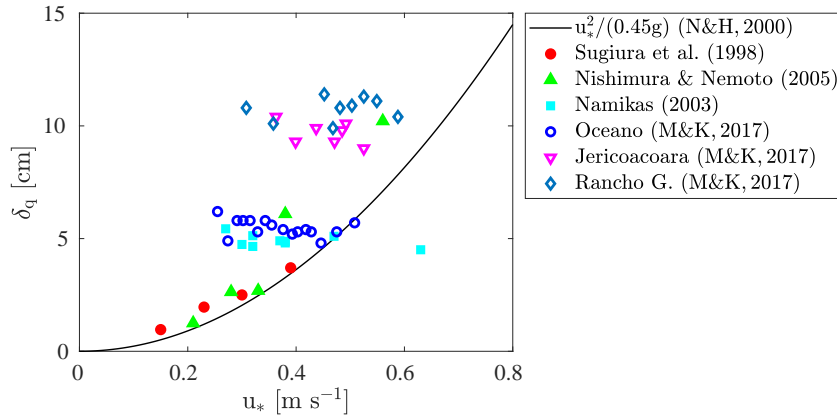

**Figure 2.** Decay height,  $\delta_q$ , as a function of the friction velocity,  $u_*$ . Results reported by Sugiura et al. (1998) after wind tunnel experiments conducted with snow and by Namikas (2003) and Martin and Kok (2017) (M&K, 2017) after field experiments conducted with sand. The values of  $\delta_q$  referring to the field measurements of Nishimura and Nemoto (2005) conducted with snow were not reported in their work. We have estimated them by fitting the mass flux measurements between 2 and 12 cm height above the surface with Eq. (4). The expression proposed by Nishimura and Hunt (2000) (N&H, 2000) is also drawn for comparison.

profile of particle mass flux followed an exponential decay over both snow surfaces and the decay height was found to increase with the wind velocity. However, significantly different values of  $\delta_q$  were obtained with each snow cover: for the same range of wind velocities,  $\delta_q$  varied between, approximately, 0.9 and 3 cm over the loose snow cover and between, approximately, 3 and 8 cm, over the hard snow cover. Even though the hard snow cover cannot be considered an erodible surface (particle ejection from the surface was rare and the mass flux in saltation was highly dependent on the seeding rate of snow particles at the upwind end of the tunnel), the results of Sato et al. (2001) highlight the influence of the snow surface characteristics on the saltation dynamics and, in particular, on the decay height. [The decay height obtained by Sato et al. \(2001\) is not presented in Fig. 2 because the respective value of  \$u\_\*\$  was not provided by the authors.](#)

The mass flux measurements of Nishimura and Nemoto (2005) were performed in Mizuho, Antarctica, using SPCs. They reported mass flux profiles obtained for friction velocities ranging from 0.21 to 0.56  $\text{m s}^{-1}$ . The respective  $\delta_q$  values are not given in the article, but these can be estimated by fitting the mass flux measurements between 2 and 12 cm height to Eq. (4). From Fig. 2, one can conclude that  $\delta_q$  increases with  $u_*$ . In addition, considering the three lowest friction velocities, a fair agreement is obtained between the computed values of  $\delta_q$  and the expression of Nishimura and Hunt (2000). At higher friction velocities, higher values of  $\delta_q$  are obtained in comparison with the quadratic expression. However, without a detailed characterization of the snow cover during the different events (which spanned a time period of 1.5 months), it is not possible to evaluate the effect of the friction velocity alone.

When performing field and wind tunnel experiments with sand, a different trend is obtained. For instance, Namikas (2003) measured the particle mass flux along the first 35 cm above the surface using wedge-shaped sediment collectors. The mea-

550 measurements were performed for friction velocities ranging from 0.27 to 0.63 m s<sup>-1</sup>. From fitting the measured profiles with Eq. (4), similar values of  $\delta_q$  were obtained. Therefore, it was concluded that  $\delta_q$  is invariant with respect to  $u_*$ . The same conclusion was reached by Martin and Kok (2017) after performing field experiments in three different locations: Oceano, Rancho Guadalupe and Jericoacoara. The particle mass flux was measured with Big Spring Number Eight (BSNE) sand traps between approximately 15 to 60 cm height above the surface. Even though this height range is above the saltation layer in the case of snow saltation, the mass flux of saltating sand still follows an exponential decay in this region (Martin et al., 2018). Based on their results, Martin and Kok (2017) suggest that  $\delta_q$  rather scales with the particle diameter. This would justify the agreement between the measurements of Martin and Kok (2017) at Oceano and those from Namikas (2003), which were performed at a similar location. Bigger sand grains were reported at Rancho Guadalupe and Jericoacoara in comparison to Oceano (Martin and Kok, 2017). Similarly, Nalpanis et al. (1993) could not verify the scaling of  $\delta_q$  with  $u_*^2$  after performing wind tunnel experiments with sand and numerical simulations.

560 By measuring the particle concentration and streamwise velocity, Creyssels et al. (2009) found that the mass flux evolution is mainly driven by the particle concentration profile. Therefore, even though the particle streamwise velocity was found to increase linearly with height in the first 5 cm above the surface,  $\delta_c$  and  $\delta_q$  were found to be approximately equal. In this way, the scaling of  $\delta_c$  with  $u_*$ , reported in Sect. 2.3.1, is expected to reflect the scaling of  $\delta_q$  with  $u_*$ . In agreement with the mass flux measurements performed with sand, Creyssels et al. (2009) and Gordon et al. (2009) did not arrive to an increase of  $\delta_c$  with the increase of  $u_*$ . In contrast, when saltation was allowed to develop over a rigid surface, Ho et al. (2011) obtained a linear increase of  $\delta_c$  with  $u_*$ . Despite the findings of Creyssels et al. (2009) regarding the equality between  $\delta_c$  and  $\delta_q$ , the values of  $\delta_q$  presented in Fig. 2 and the values of  $\delta_c$  presented in the works of Creyssels et al. (2009), Ho et al. (2011) and Gordon et al. (2009) differ in approximately one order of magnitude. In this way, the comparison between these two quantities must be performed with care.

570 The scaling of  $\delta_q$  with  $u_*$  can also be evaluated from vertical profiles of particle number flux. Considering saltating particles of uniform size, the number flux is proportional to the mass flux and, therefore, expected to follow an exponential decay of the form of Eq. (4). Aksamit and Pomeroy (2016) computed the number flux of snow particles in saltation in the first 1 cm above the surface from the recordings of high-speed images of saltating snow in a snow covered area. Even though the observed particle size distribution was not uniform but characterized by a Gamma distribution, the decay height of the number flux profile is not expected to deviate significantly from  $\delta_q$ . Similarly to the results obtained by Gordon et al. (2009) over sea ice, a clear scaling of the decay height with  $u_*$  was not found: it either increased or decreased with the rise of the friction velocity depending on the snow cover characteristics (please note that the values reported by Aksamit and Pomeroy (2016) in Figs. 7d-f do not correspond to  $l_v$  [mm], named decay length, but to  $1000/l_v - N$ . O. Aksamit, personal communication, February 11, 2023). In addition, the values obtained are one order of magnitude lower than those reported by Sugiura et al. (1998) for the same range of friction velocities and of the same order of magnitude as those reported in Gordon et al. (2009).

580 The uncertainty regarding the scaling of  $\delta_q$  with  $u_*$  can, in part, be linked to the uncertainty regarding the scaling of  $\langle v_z^e \rangle$  with  $u_*$  when saltation develops over a snow surface (see Sect. 2.2.2). The fact that  $\delta_q$  is invariant with respect to  $u_*$  is in agreement with the assumption that the ejection velocity is invariant with respect to  $u_*$ . The increase of  $\delta_q$  with the rise of  $u_*$

obtained by Sugiura et al. (1998) and Nishimura and Nemoto (2005) is not in agreement with this assumption and contrasts with the results of Gordon et al. (2009) and Aksamit and Pomeroy (2016) regarding the scaling of the decay height of the particle concentration and number flux profiles with respect to  $u_*$ . These contradictory results remain to be understood. In addition, more experimental studies are needed to understand and quantify the effect of the snow surface characteristics on  $\delta_q$ .

## 585 3 Numerical simulations

In this section, we use a numerical model to investigate the main quantities of interest in snow saltation modeling, previously discussed in Sect. 2. The numerical model comprises a Large Eddy Simulations flow solver, a Lagrangian stochastic model for the particle trajectories and a set of parameterizations that represent the processes of aerodynamic entrainment, rebound and splash (Sharma et al., 2018; Comola et al., 2019b; Sigmund et al., 2022; Melo et al., 2022). A brief description of the model is given in Sect. 3.1. Detailed numerical models, like the one described, cannot be used in atmospheric models, which require simple and computationally light algorithms. Nevertheless, they provide an excellent test bench for simple parameterizations and their underlying assumptions. The description of the numerical setup is presented in Sect. 3.2 and the main results are presented and discussed in Sect. 3.3.

### 3.1 Model description

595 The turbulent wind field is described by the continuity and Navier-Stokes equations and assumed incompressible. Following the Large Eddy Simulations (LES) technique, a filtering operator is applied to the equations in order to resolve the turbulent structures larger than the computational grid size. The turbulent structures smaller than the grid size are not resolved, but their effect on the larger structures is parameterized with a sub-grid scale (SGS) model. The numerical implementation of the LES model is based on the work of Albertson and Parlange (1999), which was continuously developed for different boundary layer studies (e.g., Giometto et al., 2016, 2017; Sharma et al., 2017). In the model, we consider the Lagrangian-averaged scale-dependent SGS model proposed by Bou-Zeid et al. (2005). The computational domain is of cuboid shape, in which periodic boundary conditions are imposed at the vertical walls. Impermeability and zero vertical gradients are assumed at the top boundary. At the bottom boundary, the logarithmic law of the wall is specified as well as the impermeability condition. The flow is driven by a constant streamwise pressure gradient equal to  $-\rho_a u_*^2 / L_z$ , where  $L_z$  [m] is the domain height. In the absence of saltating particles, this imposed pressure gradient guarantees a surface shear stress equal to  $\rho_a u_*^2$ .

The particle trajectories within the turbulent flow are modeled with a Lagrangian stochastic model (LSM) (Comola, 2017). The particle motion is computed with Newton's second law, considering the effect of gravity and aerodynamic drag. The particles are assumed spherical and the drag coefficient is computed with the expression of Schiller and Nauman (1933). Other forces applied to the particles (e.g., aerodynamic lift, electrostatic force, virtual mass) are neglected in the model. ~~The effect of other forces, as aerodynamic lift and electrostatic forces, is neglected.~~ The feedback of the particles on the flow momentum is taken into account by the addition of a reaction force in the filtered Navier-Stokes equations. It is equal in magnitude and opposite to the aerodynamic drag applied to the particles.

The surface processes of aerodynamic entrainment, rebound and splash occur at the bottom boundary, which is assumed erodible and composed of particles with a predefined size distribution. The surface processes are described by physical and statistical models, as proposed by Groot Zwaafink et al. (2014) and Comola and Lehning (2017). For instance, aerodynamic entrainment of surface particles is expected to occur when the surface shear stress is greater than the fluid threshold (Bagnold, 1941):

$$\tau_{ft} = A^2 (\rho_p - \rho_a) g \bar{d} \quad (5)$$

where  $A = 0.1$  is the fluid threshold coefficient,  $\rho_p$  [ $\text{kg m}^{-3}$ ] is the particle density and  $\bar{d}$  [m] is the average particle diameter of the erodible bed. The number of entrained particles is proportional to the difference  $\tau_s - \tau_{ft}$  (Anderson and Haff, 1991; Doorschot and Lehning, 2002). Following Clifton and Lehning (2008), it is assumed that the ejection velocity of an aerodynamically entrained particle varies according to a lognormal distribution. The mean and standard deviation of the distribution are assumed to be proportional to  $u_{*,s}$ , and the average ejection velocity of an aerodynamically entrained particle is proportional to  $u_{*,s}$  (Clifton and Lehning, 2008). The initial particle concentration at the surface is considered high enough so that there is never a shortage in the supply of erodible particles.

Following a particle impact with the granular surface, the impacting particle can rebound and some particles can be splashed from the surface. The probability of rebound increases as the particle impact velocity increases (Anderson and Haff, 1991) and the rebound velocity is given by  $\sqrt{\epsilon_r} |v^i|$ , where  $\epsilon_r = 0.25$  is the fraction of kinetic energy retained by the rebounding particle (restitution coefficient), and  $|v^i|$  [ $\text{m s}^{-1}$ ] is the modulus of the impact velocity (Doorschot and Lehning, 2002). The number of splashed particles,  $N$ , is computed with the model of Comola and Lehning (2017). In their model, the balances of kinetic energy and momentum of the collision are resolved by statistically representing the kinetic energy and momentum of the splashed particles by their mean values. As a result, the number of splashed particles varies with the characteristics of the impacting particle (mass and velocity) and the statistical characteristics of the splashed particles (mean and standard deviation of the particle size and ejection velocity). We assume that the mean ejection velocity of splashed particles varies with according to an exponential distribution. Its mean value is a function of the particle impact velocity and given by according to  $0.25 |v^i|^{0.3}$  (Sharma et al., 2018). In the model,  $N$  is also a function of other parameters that describe the granular bed as, for example, the restitution coefficient, the energy required to break the cohesive bonds between each ejected particles and the surrounding particles, and the fraction of impact kinetic energy and momentum that is lost due to friction.

The full description of the LES-LSM model can be found in previous works (e.g., Sharma et al., 2018; Comola et al., 2019b; Melo et al., 2022). In particular, the model assumptions and parameter values are presented and discussed in Melo et al. (2022).

### 3.2 Numerical settings

The computational domain consists of a cube with 6.4 m side length, uniformly discretized in each horizontal direction in 64 cells. The vertical direction is discretized in 128 cells following a hyperbolic stretching, which guarantees a more refined mesh close to the bottom boundary. The simulations are performed for 350 s. The flow is allowed to develop over the first 25 s of the



645 simulations. The start of surface erosion is only allowed after this first time period. The time step of the LES solver is set to  $5 \times 10^{-5}$  s.

In order to reproduce the snow surface characteristics reported in Sugiura et al. (1998), the particle size distribution of the granular bed is assumed normal, with a mean diameter of  $360 \mu\text{m}$  and a standard deviation of  $140 \mu\text{m}$ . A minimum and maximum particle diameter is imposed, equal to  $30 \mu\text{m}$  and  $2 \text{ mm}$ , respectively. In the experiments of Sugiura et al. (1998),  
650 the wind tunnel was maintained at  $-15^\circ\text{C}$ . Therefore, in the simulations, the air density and kinematic viscosity,  $\nu$  [ $\text{m}^2 \text{s}^{-1}$ ], are set to the respective values at that temperature ( $\rho_a = 1.37 \text{ kg m}^{-3}$ ,  $\nu = 1.2 \times 10^{-5} \text{ m}^2 \text{s}^{-1}$ ). Moreover, snow sublimation is neglected. Taking into account that the snow layer was composed of preserved natural snow that was disintegrated into individual particles prior to the experiments, the effect of interparticle cohesion is neglected in the simulations. [The remaining rebound and splash parameters are set to the values reported in Melo et al. \(2022\)](#). In addition, the particle density is assumed  
655 equal to  $917 \text{ kg m}^{-3}$ , as suggested by Sugiura et al. (1998). The roughness length,  $z_o$  [ $\text{m}$ ], is not reported in Sugiura et al. (1998) and a value of  $10^{-4} \text{ m}$  is assumed (Clifton et al., 2006).

A set of seven simulations is performed for which the friction velocity is varied between  $0.15$  and  $0.7 \text{ m s}^{-1}$ . In order to decrease the computational time, the time step of the LSM solver is set to  $10^{-4} \text{ s}$  (twice the LES time step) for the friction velocities ranging between  $0.15$  and  $0.5 \text{ m s}^{-1}$  and to  $2 \times 10^{-4} \text{ s}$  (four times the LES time step) for the higher friction velocities.  
660 In addition, the particles in saltation are grouped in parcels, composed of particles with equal diameter and following the same trajectory. Particles from the same parcel were aerodynamically entrained or splashed at the same surface location and time step. In order to guarantee that the simulation results are not affected by this approximation, the number of particles per parcel is set to [5, 50 and 100](#) ~~2, 20 and 50~~ for the friction velocities equal to  $0.15$ ,  $0.23$  and  $0.3 \text{ m s}^{-1}$ , respectively, and to  $200$  for the higher friction velocities.

### 665 3.3 Results and discussion

The vertical profiles of particle mass flux and velocity are computed by dividing the computational domain in horizontal layers. At each layer, the mass flux is computed by:

$$q(z_k) = \frac{\sum_{n=1}^{N_k} m_n v_{x_n}}{L_x L_y \Delta z_k} \quad (6)$$

where  $z_k$  [ $\text{m}$ ] and  $\Delta z_k$  [ $\text{m}$ ] are the average height above the surface and the thickness of layer  $k$ ,  $N_k$  is the total number of  
670 particles in layer  $k$ ,  $m_n$  [ $\text{kg}$ ] and  $v_{x_n}$  [ $\text{m s}^{-1}$ ] are the mass and the instantaneous streamwise velocity of the  $n^{\text{th}}$  particle in the respective layer, and  $L_x$  [ $\text{m}$ ] and  $L_y$  [ $\text{m}$ ] are the domain length and width. The particle streamwise velocity at each layer is given by the average instantaneous particle velocity considering all particles in the layer. The vertical profiles are time-averaged over the last  $100 \text{ s}$  of the simulations. [During this time period, negligible changes in the total mass of particles aloft were obtained and saltation was assumed to be in steady state.](#) ~~During this time interval, saltation is found to be in steady state.~~

675 The obtained vertical profiles of particle mass flux are presented in Fig. 3, together with the SPC measurements performed by Sugiura et al. (1998). The results obtained for friction velocities ranging from  $0.15$  to  $0.5 \text{ m s}^{-1}$  are presented in a linear

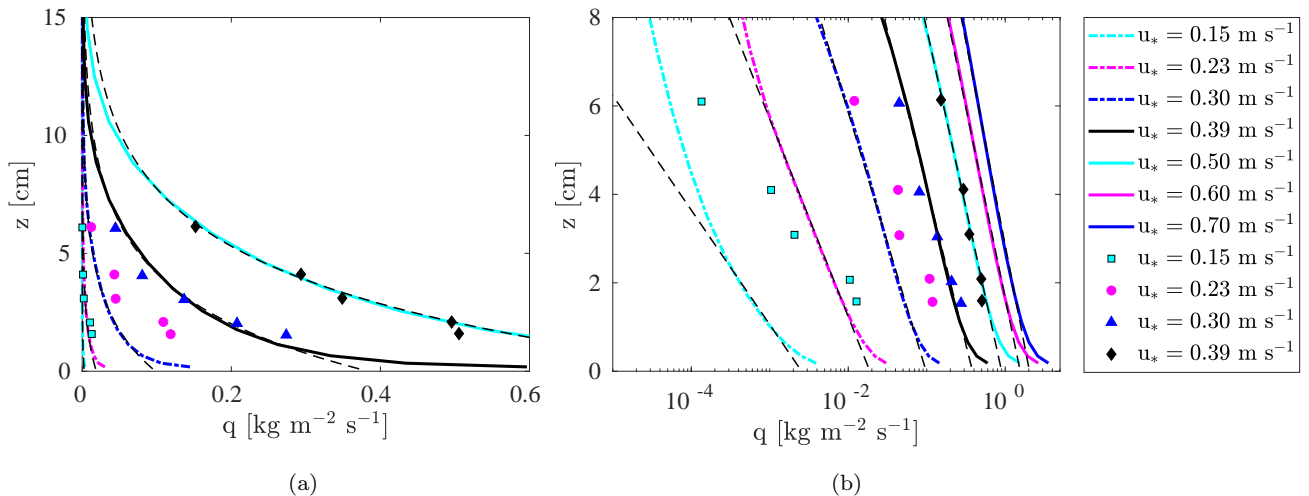

**Figure 3.** Vertical profile of particle mass flux obtained for different friction velocities. The black dashed lines are fits between the computed profiles and Eq. (4). The symbols denote the mass flux measurements performed by Sugiura et al. (1998). a) Linear plot (the mass flux profiles obtained for  $u_*$  equal to 0.6 and 0.7  $\text{m s}^{-1}$  are not represented in the figure), b) Semi-logarithmic plot.

plot (Fig. 3a) and those obtained for all simulated friction velocities are presented in a semi-logarithmic plot (Fig. 3b). Curves fitting the mass flux profiles with Eq. (4) are also presented. It can be seen that most of the mass flux profiles follow *nicely* an exponential decay in approximately the first 8 cm above the surface. The only exception is the mass flux profile obtained with the lowest friction velocity of 0.15  $\text{m s}^{-1}$ . In this case, the friction velocity outside the saltation layer is slightly lower than the assumed fluid threshold friction velocity (from Eq. (5),  $u_{*,ft} = 0.154 \text{ m s}^{-1}$ ). Therefore, saltation is highly intermittent. Sugiura et al. (1998) have also reported a fluid threshold friction velocity close to 0.15  $\text{m s}^{-1}$ . During the experiments, saltation was only sustained at this low friction velocity with the addition of seeding particles at the upwind end of the wind tunnel. For the remaining friction velocities, deviations are seen between the modeled mass flux profiles and the exponential decay in approximately the first 1 cm above the surface and above 6-12 cm height, depending on the friction velocity, due to the prevalence of particles in suspension. As discussed in Sect. 2.3.3, these trends were also observed in field measurements of snow and sand saltation (Namikas, 2003; Bauer and Davidson-Arnott, 2014; Nishimura and Nemoto, 2005).

When comparing the modeled mass flux profiles with the SPC measurements of Sugiura et al. (1998) obtained at the same friction velocities, it is clear that the numerical model is significantly underestimating the mass flux in saltation. This discrepancy could not be solved by decreasing the roughness length from  $10^{-4}$  to  $10^{-5}$  m, which is more in agreement with previous wind tunnel experiments developed with snow (Nishimura et al., 2014). Negligible improvements were also obtained by decreasing the domain height to half the height of the wind tunnel (please note that the top boundary of the domain is a symmetry plane). Despite the qualitative agreement, a quantitative agreement between simulation results and wind tunnel measurements certainly requires an adjustment in the parameters that control the surface processes of aerodynamic entrainment, rebound and

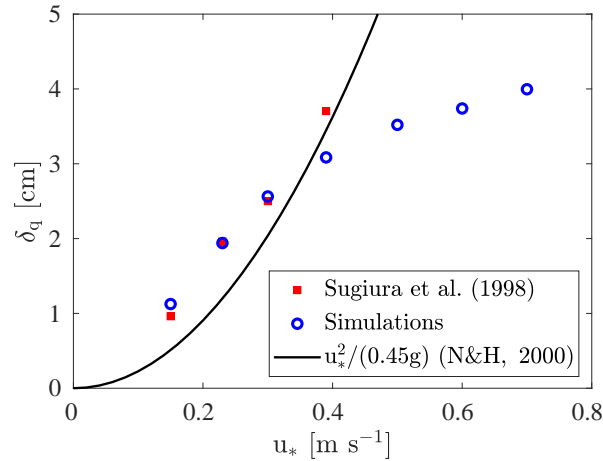

**Figure 4.** Decay height obtained by fitting the mass flux profiles presented in Fig. 3 with Eq. (4). The values reported by Sugiura et al. (1998) and the expression proposed by Nishimura and Hunt (2000) (N&H, 2000) are also presented for comparison.

695 splash. Even though a fitting exercise could be done to achieve a better agreement, we believe that detailed measurements of the near surface particle-bed interaction and of the snow particle characteristics in saltation are needed for a further understanding of the near surface processes and the development of improved parameterizations.

From fitting the computed mass flux profiles to Eq. (4), the decay height can be obtained. It is presented in Fig. 4 as a function of the friction velocity. The values obtained by Sugiura et al. (1998) after fitting the measured mass flux profiles to  
 700 Eq. (4) and the expression proposed by Nishimura and Hunt (2000) are also presented for comparison. For friction velocities ranging from 0.15 to 0.3 m s<sup>-1</sup>, there is a fair agreement between the decay height obtained from measured and modeled mass flux profiles. The decay height increases with the increase of the friction velocity and follows approximately the trend does not deviate considerably from the evolution proposed by Nishimura and Hunt (2000). However, for friction velocities greater than 0.3 m s<sup>-1</sup>, the values of decay height obtained from the modeled mass flux profiles increase with the increase of the  
 705 friction velocity at a much lower rate. In particular, the value obtained for  $u_* = 0.39$  m s<sup>-1</sup> is lower than the value obtained by Sugiura et al. (1998) and a significant deviation between the modeled values and the expression proposed by Nishimura and Hunt (2000) is seen.

Overall, the decay height obtained with the simulations increases logarithmically with  $u_*$ . At low friction velocities, the high rate of increase of  $\delta_q$  with  $u_*$  suggests that the computed vertical ejection velocity scales with  $u_*$ , as proposed by Owen  
 710 (1964) and hypothesized by Nishimura and Hunt (2000) (see discussion in Sect. 2.3.1 and 2.3.3). The agreement at low friction velocities between the modeled decay height and the expression proposed by Nishimura and Hunt (2000) suggests that the computed vertical ejection velocity scales with  $u_*$ , as proposed by Owen (1964) and discussed in Sect. 2.3.1 and 2.3.3. In Fig. 5, we present the computed vertical profiles of the particle streamwise velocity (Fig. 5a) and of the vertical velocity of upward moving particles (Fig. 5b). In the insets, the respective near surface values are presented as a function of the friction velocity:  $\bar{v}_x^{e,i}$  [m s<sup>-1</sup>] and  $\bar{v}_z^e$  [m s<sup>-1</sup>] can be regarded

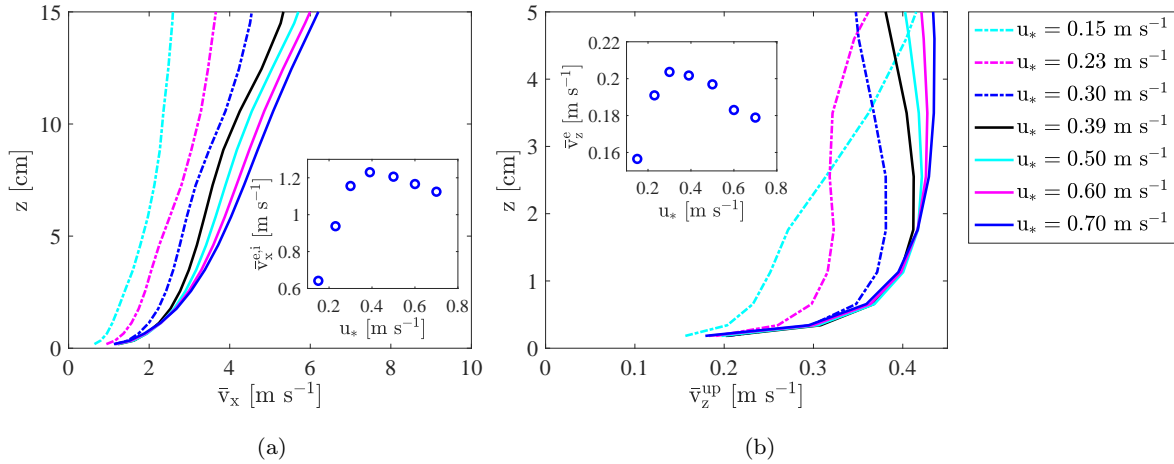

**Figure 5.** a) Vertical profiles of the particle streamwise velocity. b) Vertical profiles of the vertical velocity of upward moving particles. Results obtained for different friction velocities. The respective near surface values are presented in the inset as a function of the friction velocity.

715 as the particle slip velocity and the average vertical ejection velocity, respectively. For friction velocities ranging from 0.15 to 0.3  $\text{m s}^{-1}$ , the particle streamwise velocity increases with height and with the friction velocity. The same trend is found for the vertical velocity of upward moving particles in the first 2 cm above the surface. At these low values of  $u_*$ , the average vertical ejection velocity and particle slip velocity also increase with the rise of the friction velocity. Therefore, the obtained increase in decay height as the friction velocity rises from 0.15 to 0.3  $\text{m s}^{-1}$  is indeed accompanied by an increase of the vertical ejection  
720 velocity.

Conversely, a different trend is found for  $u_*$  ranging between 0.39 and 0.7  $\text{m s}^{-1}$ . For instance, an increase of the streamwise and vertical velocities with the increase of the friction velocity is only seen above approximately 1.5 cm height above the surface. Below this height, the particle velocity [profile](#) is mainly invariant with respect to  $u_*$ , which is in agreement with several saltation models (e.g., Kok and Renno, 2009; Niiya and Nishimura, 2022) and measurements carried out over sand  
725 (Creyssels et al., 2009; Ho et al., 2011), discussed in Sect. 2.2.2 and 2.3.2. From the insets of Fig. 5, it can be seen that the near surface velocity actually decreases with the increase of the friction velocity.

In the model, while the [average](#) ejection velocity of splashed particles scales with the particle impact velocity, the [average](#) ejection velocity of aerodynamically entrained particles scales with the surface friction velocity,  $u_{*,s}$ . The average vertical mass flux of aerodynamically entrained and splashed particles are presented in Fig. 6a and the average surface friction velocity is presented in Fig. 6b, as a function of the friction velocity. Both quantities are computed by performing a surface average over the erodible bed and a time average over the last 100 s of the simulations. In Fig. 6a, it is seen that the vertical mass flux of aerodynamically entrained particles is greater than the vertical mass flux of particles ejected via splash for  $u_*$  equal to 0.15 and 0.23  $\text{m s}^{-1}$ . For  $u_* = 0.3 \text{ m s}^{-1}$ , splash entrainment is more significant than aerodynamic entrainment, but they are both  
730

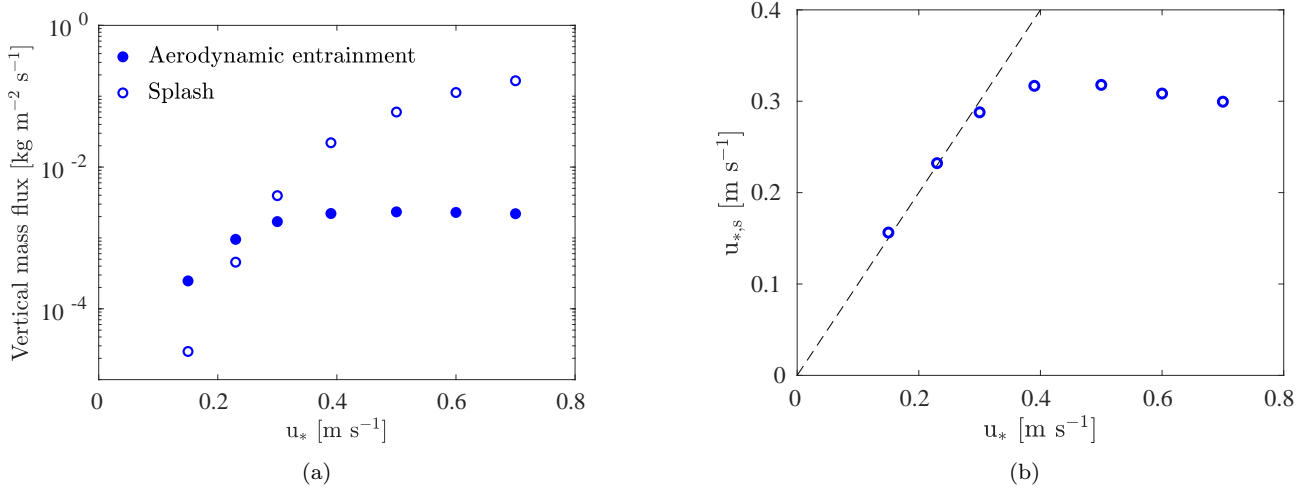

**Figure 6.** a) Vertical mass flux of aerodynamically entrained and splashed particles. b) Surface friction velocity (the dashed line is the 1:1 slope). The results presented are averages over the surface and over the last 100 s of the simulations. They are presented as a function of the friction velocity.

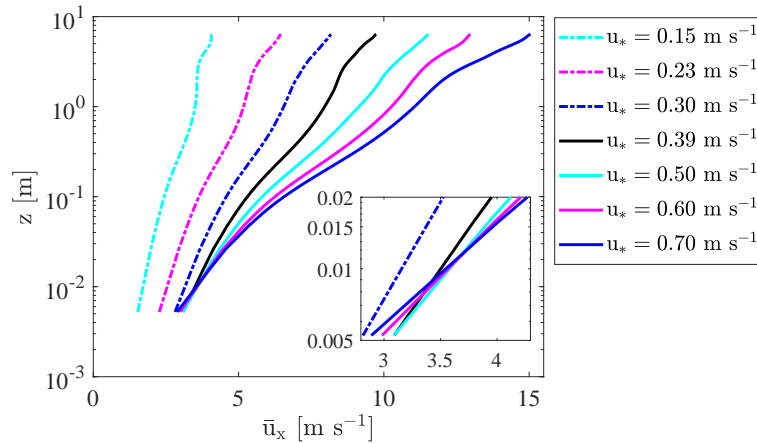

**Figure 7.** Vertical profiles of streamwise wind velocity obtained for different friction velocities during steady state saltation. The inset is a zoom-in to the near surface region.

of the same order of magnitude. For these three simulations, in which aerodynamic entrainment plays an important role during steady state saltation, the average surface friction velocity does not deviate significantly from the friction velocity outside the saltation layer (Fig. 6b). Therefore, for  $u_*$  ranging from 0.15 to 0.3  $\text{m s}^{-1}$ , the increase of the vertical ejection velocity with the rise of  $u_*$  is justified by a direct consequence of the respective increase of the surface friction velocity.

735

For friction velocities greater than  $0.3 \text{ m s}^{-1}$ , the vertical mass flux of splashed particles is at least one order of magnitude greater than the vertical mass flux of aerodynamically entrained particles (Fig. 6a). In addition, the surface friction velocity deviates considerably from the friction velocity outside the saltation layer (Fig. 6b). It reaches a value smaller than  $u_*$ , which decreases slightly with the rise of the friction velocity.

Even though the average ejection velocity of splashed particles scales with the velocity of the impacting particle and not directly with  $u_{*,s}$ , the computed particle impact velocity is highly correlated with the near surface wind velocity (and, therefore, with the surface friction velocity) because of the exchange of momentum between the fluid and the particles close to the surface. The vertical profiles of the streamwise wind velocity are presented in Fig. 7. They are computed by averaging the streamwise wind velocity along horizontal planes and over the last 100 s of the simulations. Overall, similar features are seen in comparison to Fig. 5a: for friction velocities ranging from  $0.15$  to  $0.3 \text{ m s}^{-1}$ , for which aerodynamic entrainment plays an important role, the streamwise wind velocity increases with height and friction velocity; however, at greater values of  $u_*$ , for which particle entrainment is dominated by splashed particles, the streamwise wind velocity profiles obtained during steady state saltation exhibit a focus point at approximately  $1 \text{ cm}$  above the surface. As discussed in Sect. 2.3.2, the existence of a focus point was observed in wind tunnel experiments of sand saltation (Bagnold, 1941; Li and McKenna Neuman, 2012) and is supported by numerical models that represent the surface processes of rebound and splash (Kok et al., 2012; Durán et al., 2011). Due to the focus point, at high friction velocities, the near surface wind velocity during steady state saltation is approximately invariant with respect to  $u_*$ . Nevertheless, below the focus point, the streamwise wind velocity decreases slightly as  $u_*$  increases (see zoom-in to the near surface region in the inset of Fig. 7). Below the first grid point above the surface ( $\sim 5 \text{ mm}$ ), the wind velocity is assumed to follow a logarithmic profile characterized by a constant roughness length. Therefore, the obtained increase in streamwise wind velocity at the first grid point above the surface as the friction velocity rises from  $0.15$  to  $0.3 \text{ m s}^{-1}$  implies an increase in the surface friction velocity with respect to  $u_*$  (Fig. 6b). Conversely, the slight decrease in streamwise wind velocity at the first grid point above the surface as  $u_*$  rises above  $0.39 \text{ m s}^{-1}$  justifies the slight decrease in  $u_{*,s}$  as the friction velocity increase from  $0.39$  to  $0.7 \text{ m s}^{-1}$  observed in Fig. 6b. As the motion of most saltating particles takes place in the near surface region, the obtained decrease of the near surface particle velocity as the friction velocities rises above  $0.39 \text{ m s}^{-1}$  observed in the insets of Fig. 5 is related to the respective decrease of the streamwise wind velocity below the focus point as  $u_*$  increases. Indeed, the motion of most saltating particles takes place in the near surface region, where the wind velocity is mainly invariant with respect to the friction velocity outside the saltation layer. Other particles that reach higher elevations and attain greater streamwise velocities are decelerated by the fluid flow as they approach the surface. In this way, the obtained decrease of the near surface particle velocity as the friction velocities rises above  $0.39 \text{ m s}^{-1}$  is related to the respective decrease of  $u_{*,s}$  with the increase of  $u_*$ .

At these high friction velocities greater than  $0.3 \text{ m s}^{-1}$ , the current numerical model does not confirm neither the scaling of the ejection velocity with the friction velocity outside the saltation layer, nor the scaling of the decay height with the vertical ejection velocity. In fact, even though the vertical ejection velocity decreases with the rise of the friction velocity for  $u_* > 0.3 \text{ m s}^{-1}$  (inset in Fig. 5b), the decay height increases monotonically with  $u_*$  (Fig. 4). Therefore, the model proposed by Nishimura and Hunt (2000) might not be appropriate to parameterize the decay height during splash dominated saltation.

The obtained evolution of  $u_{*,s}$  at low friction velocities presented in Fig. 6b contrasts with the results of sand saltation models. For instance, Kok and Renno (2009) neglected the surface process of aerodynamic entrainment and found  $u_{*,s}$  to decrease monotonically with the increase of the friction velocity. Sand particles have a higher density than snow particles, which implies a higher fluid threshold. In addition, as discussed in Sect. 2.2.1, the surface shear stress is expected to be lower than the fluid threshold, which restricts the occurrence of aerodynamic entrainment during steady state saltation, even at low friction velocities.

In contrast, similar features are seen in some snow saltation models in which aerodynamic entrainment is represented. For example, Nemoto and Nishimura (2004) found the surface friction velocity to increase monotonically with the rise of the friction velocity from 0.23 to 0.39  $\text{m s}^{-1}$ . The same increase in  $u_{*,s}$  is seen in Fig. 6b for this range of friction velocities. The values of  $u_{*,s}$  found by Nemoto and Nishimura (2004) are greater than the specified fluid threshold friction velocity, which suggests that aerodynamic entrainment also plays a role in their steady state conditions. The process of aerodynamic entrainment is also taken into account in the numerical model of Doorschot and Lehning (2002). In their model, the parameterizations for aerodynamic entrainment and rebound are similar to those described in Sect. 3.1, but the saltation system is - for simplicity - assumed to be either entirely composed of aerodynamically entrained particles or of particles that continuously rebound from the surface (in their model, no distinction is made between rebound and splash). Similarly to the results presented in Fig. 6, Doorschot and Lehning (2002) found saltation to be dominated by aerodynamic entrainment at low friction velocities and to be dominated by rebounding/splashed particles at high friction velocities. In addition, at low friction velocities, the surface friction velocity increases with the rise of  $u_*$  and a negligible deviation is seen between the values of  $u_{*,s}$  and  $u_*$  due to the low number of particles aloft. At high friction velocities,  $u_{*,s}$  decreases slightly with the rise of  $u_*$ . In their model, the friction velocity at which the transition from aerodynamic entrainment to rebound/splash occurs depends primarily on the assumed restitution coefficient. This coefficient is expected to be highly dependent on the snow surface characteristics, which highlights the importance of the snow cover properties to the correct description of snow saltation and its scaling laws.

In the snow saltation model of Niiya and Nishimura (2022),  $u_{*,s}$  is found to decrease slightly with the increase of the friction velocity from 0.24 to 0.3  $\text{m s}^{-1}$ . This differs from the increase of  $u_{*,s}$  found in Fig. 6b for the same range of friction velocities. In their work, the fluid threshold friction velocity is assumed equal to 0.24  $\text{m s}^{-1}$  and the surface friction velocity is found to be approximately equal to 0.2  $\text{m s}^{-1}$ . In comparison with the current simulations, Niiya and Nishimura (2022) assumed a higher value for the fluid threshold friction velocity (0.24 versus 0.154  $\text{m s}^{-1}$ ) and a lower value for the roughness length ( $10^{-5}$  versus  $10^{-4}$  m). When decreasing  $z_o$  from  $10^{-4}$  to  $10^{-5}$  m in the LES-LSM, we obtain a significant decrease in the surface friction velocity during splash dominated saltation. In this way, a decrease in  $z_o$  and an increase in  $\tau_{ft}$  reduce the range of friction velocities for which saltation is controlled by aerodynamic entrainment, which might justify the seemingly different results obtained with both models. In addition to the roughness length and the fluid threshold, other parameters that characterize the snow surface and highly influence the surface processes of aerodynamic entrainment, rebound and splash are expected to influence the importance of aerodynamic entrainment during steady state saltation. The narrower the range of friction velocities for which aerodynamic entrainment plays an important role, the narrower is the range of friction velocities for which the decay height is well approximated by the expression of Nishimura and Hunt (2000).

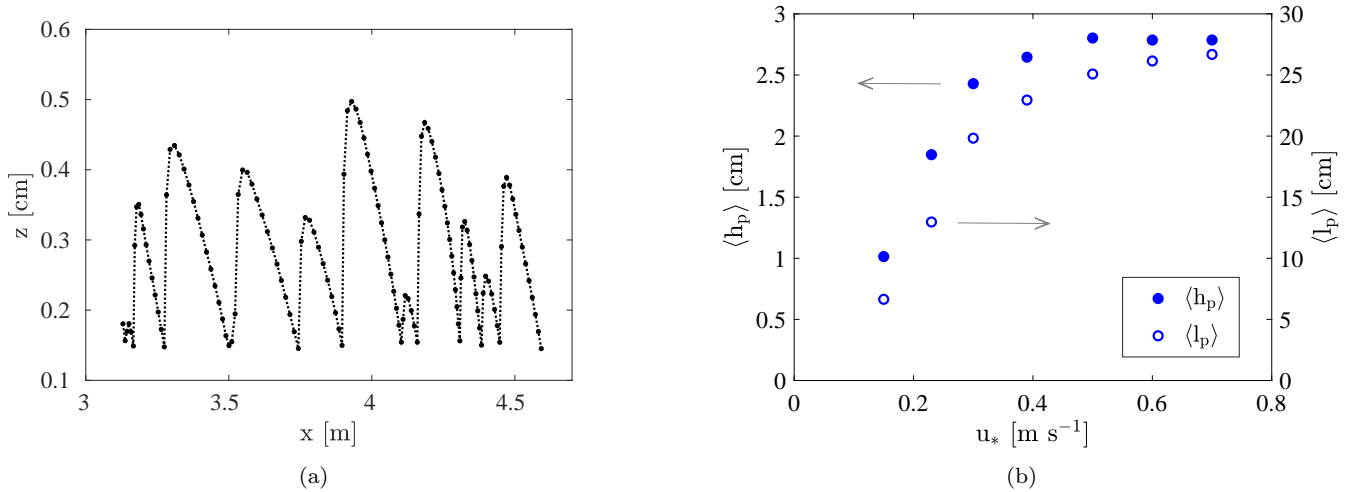

**Figure 8.** a) Example of a particle trajectory obtained for  $u_* = 0.39 \text{ m s}^{-1}$  (2D projection). b) Average hop height and length as a function of the friction velocity (the arrows indicate the respective y-axis of each set of values).

The modeled saltation system is further investigated by the analysis of the particle hop height and length. The average hop height and length of saltating particles are computed from the analysis of all particle hops during the last 1 s of simulations. During this time period, the location of all particles aloft was outputted by the model at a very high frequency. In this analysis, a particle hop is defined as a fraction of a particle trajectory limited by two consecutive local minimums located close to the surface. The hop height is given by the maximum height attained by the particle along the respective hop. ~~we exclude the particles moving without regular contact with the bed (particles in suspension), as well as saltating particles with a highly perturbed or incomplete trajectory. As a result, we have analyzed the trajectories of approximately 70 % of all particles moving along the first 8 cm above the surface during the studied time period.~~ An example of a particle trajectory comprised of several hops ~~included in the analysis~~ is presented in Fig. 8a. The particles seldom reach the surface because the surface processes of rebound and splash are assumed to take place as soon as the particles reach a height lower than  $z = 4\bar{d} = 0.14 \text{ cm}$ .

The resultant average hop height and length are presented in Fig. 8b as a function of the friction velocity. The average hop height increases with the rise of the friction velocity until  $u_* = 0.5 \text{ m s}^{-1}$ . ~~For the range of friction velocities studied, the average hop height mainly increases with the rise of the friction velocity (a slight decrease in the mean value is only seen when  $u_*$  rises from 0.6 to 0.7 m s $^{-1}$ ).~~ It increases with a higher rate for  $u_*$  ranging from 0.15 to 0.3 m s $^{-1}$ , which is in agreement with the evolution found for the vertical ejection velocity and the decay height (Figs. 4 and 5b). As  $u_*$  increases above 0.3 m s $^{-1}$  and saltation becomes splash dominated, the average hop height increases ~~only slightly~~ at a lower rate with the rise of the friction velocity. It reaches a plateau at  $u_* = 0.5 \text{ m s}^{-1}$  of approximately 2.8 cm, ~~reaching a maximum value of approximately 1.8 cm. At these high friction velocities, For  $u_* > 0.3 \text{ m s}^{-1}$ ,~~ even though the vertical ejection velocity decreases with the rise of the friction velocity (Fig. 5b),  $\langle h_p \rangle$  is approximately invariant with respect to  $u_*$ . This apparent discrepancy is related to the fact that the hop height does not depend



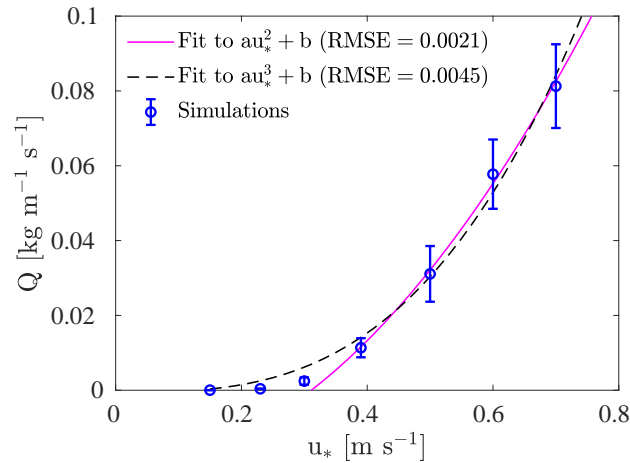

**Figure 9.** Transport rate as a function of the friction velocity. The curves represent fits between the results obtained for  $u_* > 0.3 \text{ m s}^{-1}$  and quadratic and cubic functions. RSME denotes the root mean square error of the fit. The error bars are two times the standard deviation of the results.

solely on the vertical ejection velocity, but also on the vertical component of the aerodynamic force applied to a particle along its trajectory.

As discussed in Sect. 2.3.1 and 2.3.3, the decay height is expected to scale with the average hop height of particles in saltation (Nishimura and Hunt, 2000; Gordon et al., 2009; Martin and Kok, 2017). However, in the model, a linear relationship between  $\langle h_p \rangle$  and  $\delta_q$  is not found for  $u_* > 0.3 \text{ m s}^{-1}$ . The modeled saltation system is not only comprised of particles undergoing ballistic trajectories, but it also includes particles with highly disturbed trajectories travelling without regular contact with the surface. In this context, it is reasonable to assume that  $\delta_q$  does not only depend entirely on the hop height of ballistic hops, but also on the particle motion induced by turbulent eddies but on the particle motion of all particles that contribute to the particle mass flux in the saltation layer.

The average particle hop length,  $\langle l_p \rangle$ , increases continuously with the rise of the friction velocity. follows the same trend as the average hop height: it mainly increases with the rise of the friction velocity (a slight decrease in the mean value is only found when  $u_*$  rises from 0.6 to 0.7 m s<sup>-1</sup>) and the rate at which  $\langle l_p \rangle$  increases as the friction velocity rises is higher Similarly to the average hop height, it increases at a higher rate when  $u_*$  varies between 0.15 and 0.3 m s<sup>-1</sup> than when  $u_*$  is greater than 0.3 m s<sup>-1</sup> (Fig. 8b). In this way, when saltation is dominated by splash, the particle hop length can be approximated as invariant with respect to  $u_*$ , which is in agreement with the saltation model of Ungar and Haff (1987), discussed in Sect. 2.2.3. If we approximate the impact threshold by the average surface friction velocity when saltation is dominated by splash ( $u_{*,it} \approx 0.31 \text{ m s}^{-1}$ ), the studied values of friction velocity are within the low-velocity regime defined by Durán et al. (2011) when modeling sand saltation ( $u_*/u_{*,it} < 4$ ). At these friction velocities, Durán et al. (2011) expect saltation to be dominated by splash and the average hop length to be invariant with respect to  $u_*$ . Indeed, when saltation is dominated by splash, the current results are in agreement with those from Durán et al. (2011).

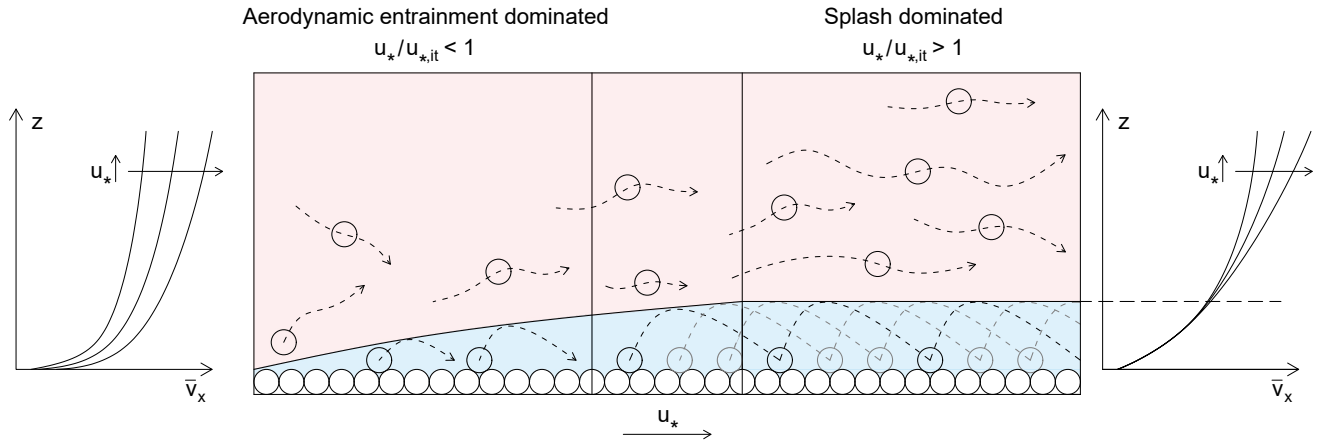

**Figure 10.** Illustration of the saltation system for increasing values of  $u_*$ : representation of the aerodynamic entrainment dominated and splash dominated regimes. The line enclosing the ballistic trajectories indicates the average hop height of the saltating particles. The particle streamwise velocity profiles characteristic of each regime are presented on the left and right-hand sides of the figure for increasing values of  $u_*$ . The dashed line on the plot on the right indicates the average hop height during splash dominated saltation.

845 If  $\langle l_p \rangle$  is mainly invariant with respect to  $u_*$ , the transport rate is expected to scale with  $u_*^2$ . The transport rate is presented in Fig. 9 as a function of the friction velocity. It is computed by integrating the particle mass flux along the height, from the surface to 15 cm height. The fits between the computed values obtained for  $u_* > 0.3 \text{ m s}^{-1}$  and a quadratic function as well as a cubic function are also presented. Indeed, the transport rate obtained during splash dominated saltation is in good agreement with a quadratic curve, but the root mean square error (RMSE) of the cubic function is only slightly higher. When considering

850 the full range of friction velocities, a better agreement is actually found with the cubic function. These results highlight the need to acquire mass flux measurements for a wide range of friction velocities and snow surface characteristics to fully evaluate the scaling of the transport rate with the friction velocity.

The two saltation regimes obtained with the model (dominated by aerodynamic entrainment or splash) are illustrated in Fig. 10. In summary, as the friction velocity increases, the saltation system evolves from an aerodynamic entrainment dominated

855 system to one dominated by splashed particles. In the first regime, the particle streamwise velocity increases with the rise of the friction velocity at all heights and the average hop height of saltating particles (represented by the line enclosing the ballistic trajectories) increases as well. As the friction velocity reaches higher values, the average hop height stops increasing significantly with the rise of the friction velocity. In fact, once saltation is dominated by splash, the average hop height is approximately invariant with respect to  $u_*$ . In addition, the particle streamwise velocity is also mainly invariant with respect to  $u_*$

860 in the near surface region where most saltating particles are. These two saltation regimes are typical of saltation systems characterized by an impact threshold friction velocity,  $u_{*,it}$ , greater than the fluid threshold friction velocity,  $u_{*,ft}$ . As previously discussed, this is not characteristic of sand saltation, but is probably representative of snow saltation for some snow surface characteristics. For the full range of friction velocities, the line indicating the average hop height of saltating particles separates

the regions where particle motion is controlled by wind-particle interaction only (above) and where it is highly dependent on  
865 the particle-bed interaction (below).

The conceptual model of snow saltation illustrated in Fig. 10 neglects the effect of large turbulent eddies that exist over  
snow covered regions subjected to high friction velocities. Indeed, these large eddies will enhance the entrainment of particles  
in suspension and, perhaps, limit or suppress the motion of particles in saltation. This limiting case goes beyond the scope of  
this study and needs further investigation. It cannot be evaluated with the computational domain considered in this analysis  
870 nor with wind tunnel experiments. In addition, it represents a challenge for the instruments currently available to assess snow  
saltation dynamics.

#### 4 Summary and outlook

The importance of drifting snow events to the mass and energy balances of snow covered regions has long been acknowledged  
by the scientific community. Several atmospheric and snow models are currently enriched with drifting snow schemes that  
875 represent the aeolian transport of snow and quantify the induced changes in snow height and the amount of snow sublimation.  
Nevertheless, the correct prediction of these quantities is still a challenge. This is due to the complexity of the phenomenon, the  
uncertainties in the parameters that control drifting snow transport and sublimation, but also due to inaccuracies in the drifting  
snow schemes themselves.

In this work, we focus on an important part of drifting snow schemes that is typically overlooked: the saltation model. By  
880 comparing the saltation models used in the drifting snow schemes of RACMO, MAR, Meso-NH and CRYOWRF (Amory  
et al., 2021; Vionnet et al., 2014; van Wessem et al., 2018; Sharma et al., 2023) with the different theoretical, experimental  
and numerical studies on sand and snow saltation, we conclude that the parameterizations employed are not fully aligned with  
the current understanding of snow saltation dynamics. In addition, by performing numerical simulations with a LES-based  
model, we verify the consistency of some parameterizations and show the relationship between them and the prevalence of  
885 aerodynamically entrained or splashed particles.

In the saltation model of RACMO and MAR, the particle mass flux in the saltation layer is assumed uniform in height  
(Pomeroy and Gray, 1990). This contrasts with the well documented exponential decay found in wind tunnel and field obser-  
vations of sand and snow saltation, as well as numerical simulations. In addition, the calculation of the transport rate and of the  
particle concentration at the top of the saltation layer is based on the assumption that the saltation layer height is proportional  
890 to  $u_*^2$  and that the average particle streamwise velocity in the saltation layer is invariant with respect to  $u_*$ . Even though both  
scaling laws can be obtained from theoretical, numerical or experimental studies, depending on the friction velocity and on  
the snow surface characteristics, these two assumptions are contradictory. While the first is based on the idea that the near  
surface particle velocity scales with  $u_*$ , the latter is based on the notion that the near surface particle velocity is invariant with  
respect to  $u_*$ . As a result, the transport rate is found to scale linearly with  $u_*$ , which contrasts with most saltation models and  
895 measurements available in the literature (e.g., Doorschot and Lehning, 2002; Sørensen, 2004; Melo et al., 2022). Differently,  
the saltation models used in Meso-NH and CRYOWRF assume that the particle mass flux profile follows an exponential decay.

However, when computing the decay height and the particle concentration, which are a function of the height of the saltation layer and of the average particle streamwise velocity, they consider the same contradictory parameterizations regarding the near surface particle velocity.

900 The available experimental and numerical studies show that the near surface particle velocity is invariant with respect to  $u_*$  when saltation develops over a sand covered surface. In this case, the average hop height of saltating particles, the height of the saltation layer and the decay height of the exponential mass flux and concentration profiles are found to be equally invariant with respect to  $u_*$ . However, when saltation develops over snow covered surfaces, the scaling of these different quantities with  $u_*$  is less clear. While early wind tunnel studies reveal that the decay height of the mass flux profile scales with  $u_*^2$  (and, 905 therefore, that the near surface particle velocity scales with  $u_*$ ) (Sugiura et al., 1998), recent experiments do not reveal a clear scaling of the decay height with the friction velocity and show that the scaling of the near surface particle velocity with  $u_*$  depends on the snow surface characteristics (Aksamit and Pomeroy, 2016; Gordon et al., 2009).

From numerical simulations, we show that the scaling of the near surface particle velocity, average hop height and decay height are a function of the saltation regime: when saltation is dominated by aerodynamic entrainment, the near surface particle 910 velocity and the average hop height increase with the friction velocity; when saltation is dominated by splash, these two quantities are mainly invariant with respect to  $u_*$ . ~~For both saltation regimes, the decay height of the mass flux profile is expected to increase with the friction velocity. However,~~ For the full range of friction velocities studied, the decay height is found to increase logarithmically with  $u_*$ . Therefore, the rate of increase of the decay height with  $u_*$  decreases as  $u_*$  rises. Thus, when saltation is dominated by splash, ~~the decay height~~ the decay height increases at a much lower rate than what is obtained when saltation is dominated by aerodynamic 915 entrainment. When saltation is dominated by splash, the decay height significantly deviates from the evolution proposed by Nishimura and Hunt (2000), which is considered in the drifting snow schemes of Meso-NH and CRYOWRF. The effect of the saltation regime on the saltation dynamics and its scaling laws might partly justify the different results obtained by Sugiura et al. (1998) in a wind tunnel in comparison to the results obtained by Gordon et al. (2009) and Aksamit and Pomeroy (2016) in the field. Indeed, the limited size of a wind tunnel might restrict the development of a fully developed saltation system dominated 920 by splash. This increases the relative importance of aerodynamic entrainment and might justify the observed scaling of the decay height with  $u_*^2$  obtained by Sugiura et al. (1998). Other aspects, such as the height at which the particle concentration and mass flux are measured and the snow surface characteristics, are also expected to significantly influence the decay height and its scaling with  $u_*$ . Further investigation is needed to fully understand the impact of these different aspects on the decay height.

925 In general, the saltation models used in RACMO, MAR, Meso-NH and CRYOWRF have a poor representation of the effect of the snow surface characteristics on the different quantities of interest. The snow surface characteristics have a direct effect on the fluid threshold, which is used as an approximation for the surface shear stress. Therefore, they influence the transport rate and the average particle streamwise velocity. However, even though both the fluid threshold and the surface shear stress are found to increase as the grain diameter increases, the opposite is found for the particle streamwise velocity from 930 previous works. In addition, the numerical simulations suggest that the surface shear stress might not be well approximated by the fluid threshold and that it increases with the rise of the friction velocity when saltation is dominated by aerodynamic

entrainment. Therefore, improvements are needed to correctly take into account the effect of the snow surface characteristics on the snow saltation parameterizations. For instance, the coefficients in the expression of Sørensen (2004) used in Meso-NH and CRYOWRF to compute the transport rate are assumed constant. However, they are expected to vary with the snow surface characteristics. Extensive measurement campaigns are needed in order to fully understand and quantify the effect of the snow surface on the saltation dynamics. In addition, it is essential that future experimental studies describe the characteristics of both the snow surface, the wind field and the particles in saltation.

In this work, we have mainly analyzed the parameterizations used to compute the transport rate and the vertical profiles of particle mass flux, concentration and streamwise velocity. However, the description of snow saltation in a drifting snow scheme is also dependent on the parameterizations used for the fluid threshold, the particle size distribution and the implementation of the lower boundary condition for the snow suspension scheme. Therefore, a complete assessment of a saltation model must take these parameterizations into account. In addition, the height at which the lower boundary condition is specified must be in agreement with the assumed parameterizations. The actual value used in drifting snow schemes (which is typically given by the height of the saltation layer) is rather irrelevant. However, one must guarantee that all parameterizations that constitute the saltation model are valid at that height. For instance, when saltation is dominated by splash, the presented simulation results show that the average particle streamwise velocity is only invariant with respect to  $u_*$  in the first 1-2 cm above the surface. Even though saltating particles can reach higher elevations, the use of the previous assumption supports the application of the lower boundary condition close to the surface. Indeed, all studied drifting snow schemes set the lower boundary condition at a height relatively close to the surface: typically, its value increases with  $u_*$ , reaching a value of 5-6 cm for  $u_* = 0.8 \text{ m s}^{-1}$  (Pomeroy and Gray, 1990; Pomeroy and Male, 1992). However, the particle size distribution at the lower boundary is generally assumed independent of the snow surface characteristics (Vionnet et al., 2014; Sharma et al., 2023), which is not a reasonable approximation close to the surface, but only at higher elevations, close to the saltation-suspension interface (8-10 cm). The lower boundary condition of snow suspension schemes can be specified at this location. However, the parameterization for the particle streamwise velocity would have to be adjusted, in particular its scaling with  $u_*$ . Even though this would add additional unknown parameters to the model, the use of an advanced parameterization for the particle streamwise velocity would allow the description of saltation systems dominated by aerodynamic entrainment. Nevertheless, when setting the lower boundary at a higher elevation, one must bear in mind that the particle mass flux profile is expected to deviate from an exponential decay at the saltation-suspension interface (e.g., Nishimura and Nemoto, 2005). Taking into account the advantages and disadvantages, this choice is left to the modeler.

The snow saltation parameterizations studied in this work are based on the steady state saltation assumption. Even though this approximation is widely used, it does not fully represent the phenomenon of snow saltation in natural environments. Non stationary wind conditions (Aksamit and Pomeroy, 2018) and intermittent saltation (Paterna et al., 2016; Comola et al., 2019c) have been recently studied, but further investigation is needed to incorporate these findings in simple parameterizations.

The correct prediction of snow transport and sublimation at large scales has a variety of challenges. One of them is the representation of snow saltation by means of simple parameterizations. Snow saltation is a complex phenomenon, challenging to measure and model at both small and large scales. The full understanding of the processes involved is a multi-disciplinary

endeavour, which requires contributions from both atmospheric and snow scientists. By means of a thorough and careful analysis of previous developments, as well as new simulations, this work offers a new insight into the saltation system and presents some pathways to improve the representation of snow saltation in atmospheric models.

970 *Code and data availability.* The code is available and maintained at the institutional GitLab repository (<https://gitlabext.wsl.ch/atmospheric-models/les-lsm>). The code version used in the simulations, the results presented and the post-processing scripts used to analyze the simulation outputs and produce the figures are available at a temporary location (<https://enacshare.epfl.ch/dXuMQd98nE6wUprTaBhAv>). After acceptance, this documentation will be uploaded to the EnviDat repository (<https://www.envidat.ch>).

*Author contributions.* DBM performed the simulations, implemented the post-processing scripts and made the literature review. DBM, AS  
975 and ML contributed to the analysis of the results. AS and DBM contributed to the code development and its maintenance. ML supervised the work and secured its funding. DBM prepared the manuscript with contributions from all co-authors.

*Competing interests.* The authors declare that they have no conflict of interest.

*Acknowledgements.* The authors acknowledge the Swiss National Science Foundation (SNSF) for the financial support (project number 179130) and the Swiss National Supercomputing Centre (CSCS) for providing the computational resources (projects s1031 and s1115).  
980 Pedro Cabral is acknowledged for the numerous in-depth discussions about physics and fluid dynamics, which contributed to the presented literature review and subsequent analysis, for preparing Figs. 1 and 9 and for the detailed revision of the text. Raleigh L. Martin, Kouichi Nishimura, Nikolas O. Aksamit, Masaki Nemoto and Konosuke Sugiura are acknowledged for promptly providing extra clarifications about their works.

## References

- 985 Aksamit, N. O. and Pomeroy, J. W.: Near-surface snow particle dynamics from particle tracking velocimetry and turbulence measurements during alpine blowing snow storms, *The Cryosphere*, 10, 3043–3062, <https://doi.org/10.5194/tc-10-3043-2016>, 2016.
- Aksamit, N. O. and Pomeroy, J. W.: Scale Interactions in Turbulence for Mountain Blowing Snow, *Journal of Hydrometeorology*, 19, 305–320, 2018.
- Albertson, J. D. and Parlange, M. B.: Natural integration of scalar fluxes from complex terrain, *Advances in Water Resources*, 23, 239–252,   
990 [https://doi.org/10.1016/S0309-1708\(99\)00011-1](https://doi.org/10.1016/S0309-1708(99)00011-1), 1999.
- Amory, C., Trouvilliez, A., Gallée, H., et al.: Comparison between observed and simulated aeolian snow mass fluxes in Adélie Land, East Antarctica, *The Cryosphere*, 9, 1373–1383, <https://doi.org/10.5194/tc-9-1373-2015>, 2015.
- Amory, C., Kittel, C., Le Toumelin, L., Agosta, C., Delhasse, A., Favier, V., and Fettweis, X.: Performance of MAR (v3.11) in simulating the drifting-snow climate and surface mass balance of Adélie Land, East Antarctica, *Geoscientific Model Development*, 14, 3487–3510,   
995 <https://doi.org/10.5194/gmd-14-3487-2021>, publisher: Copernicus GmbH, 2021.
- Anderson, R. S. and Haff, P. K.: Wind modification and bed response during saltation of sand in air, in: *Aeolian Grain Transport 1*, edited by Barndorff-Nielsen, O. E. and Willetts, B. B., pp. 21–51, Springer Vienna, 1991.
- Anderson, R. S., Sørensen, M., and Willetts, B. B.: A review of recent progress in our understanding of aeolian sediment transport, in: *Aeolian Grain Transport 1*, edited by Barndorff-Nielsen, O. E. and Willetts, B. B., pp. 1–19, Springer Vienna, 1991.
- 1000 Araoka, K. and Maeno, N.: Dynamical behaviors of snow particles in the saltation layer, in: *Proceedings of the Third Symposium on Polar Meteorology and Glaciology*, vol. 19, pp. 253–263, Mem. Natl. Inst. Polar Res., Tokyo, 1981.
- Bagnold, R. A.: *The Physics of Blown Sand and Desert Dunes*, Dover Publications, 1941.
- Bagnold, R. A.: The nature of saltation and of ‘bed-load’ transport in water, *Proceedings of the Royal Society of London A*, 332, 473–504,   
<https://doi.org/10.1098/rspa.1973.0038>, 1973.
- 1005 Bartelt, P. and Lehning, M.: A physical SNOWPACK model for the Swiss avalanche warning: Part I: numerical model, *Cold Regions Science and Technology*, 35, 123–145, [https://doi.org/10.1016/S0165-232X\(02\)00074-5](https://doi.org/10.1016/S0165-232X(02)00074-5), 2002.
- Bauer, B. O. and Davidson-Arnott, R. G. D.: Aeolian particle flux profiles and transport unsteadiness, *Journal of Geophysical Research: Earth Surface*, 119, 1542–1563, <https://doi.org/10.1002/2014JF003128>, 2014.
- Bou-Zeid, E., Meneveau, C., and Parlange, M.: A scale-dependent Lagrangian dynamic model for large eddy simulation of complex turbulent   
1010 flows, *Physics of Fluids*, 17, 025 105, <https://doi.org/10.1063/1.1839152>, 2005.
- Clifton, A., Rüedi, J.-D., and Lehning, M.: Snow saltation threshold measurements in a drifting-snow wind tunnel, *Journal of Glaciology*, 52, 585–596, <https://doi.org/10.3189/172756506781828430>, publisher: Cambridge University Press, 2006.
- Comola, F.: Stochastic modeling of snow transport and hydrologic response in alpine terrain, Ph.D. thesis, Ecole Polytechnique Fédérale de Lausanne, Lausanne, Switzerland, 2017.
- 1015 Comola, F. and Lehning, M.: Energy- and momentum-conserving model of splash entrainment in sand and snow saltation, *Geophysical Research Letters*, 44, 1601–1609, <https://doi.org/10.1002/2016GL071822>, 2017.
- Comola, F., Kok, J. F., Gaume, J., Paterna, E., and Lehning, M.: Fragmentation of wind-blown snow crystals, *Geophysical Research Letters*, 44, 4195–4203, <https://doi.org/https://doi.org/10.1002/2017GL073039>, 2017.
- Comola, F., Gaume, J., Kok, J. F., and Lehning, M.: Cohesion-Induced Enhancement of Aeolian Saltation, *Geophysical Research Letters*,   
1020 46, 5566–5574, <https://doi.org/10.1029/2019GL082195>, 2019a.

- Comola, F., Giometto, M. G., Salesky, S. T., Parlange, M. B., and Lehning, M.: Preferential Deposition of Snow and Dust Over Hills: Governing Processes and Relevant Scales, *Journal of Geophysical Research: Atmospheres*, 124, 7951–7974, 2019b.
- Comola, F., Kok, J. F., Chamecki, M., and Martin, R. L.: The Intermittency of Wind-Driven Sand Transport, *Geophysical Research Letters*, 46, 13 430–13 440, <https://doi.org/10.1029/2019GL085739>, 2019c.
- 1025 Comola, F., Kok, J. F., Lora, J. M., Cohanim, K., Yu, X., He, C., McGuiggan, P., Hörst, S. M., and Turney, F.: Intermittent saltation drives Mars-like aeolian activity on Titan, *EarthArXiv*, 2021.
- Creyssels, M., Dupont, P., Moctar, A. O. E., Valance, A., Cantat, I., Jenkins, J. T., Pasini, J. M., and Rasmussen, K. R.: Saltating particles in a turbulent boundary layer: experiment and theory, *Journal of Fluid Mechanics*, 625, 47–74, <https://doi.org/10.1017/S0022112008005491>, 2009.
- 1030 Dai, X. and Huang, N.: Numerical simulation of drifting snow sublimation in the saltation layer, *Scientific Reports*, 4, 6611, <https://doi.org/10.1038/srep06611>, 2014.
- Doorschot, J. J. J. and Lehning, M.: Equilibrium Saltation: Mass Fluxes, Aerodynamic Entrainment, and Dependence on Grain Properties, *Boundary-Layer Meteorology*, 104, 111–130, <https://doi.org/10.1023/A:1015516420286>, 2002.
- Durán, O., Claudin, P., and Andreotti, B.: On aeolian transport: Grain-scale interactions, dynamical mechanisms and scaling laws, *Aeolian Research*, 3, 243–270, <https://doi.org/10.1016/j.aeolia.2011.07.006>, 2011.
- 1035 Déry, S. J., Taylor, P., and Xiao, J.: The Thermodynamic Effects of Sublimating, Blowing Snow in the Atmospheric Boundary Layer, *Boundary-Layer Meteorology*, 89, 251–283, <https://doi.org/10.1023/A:1001712111718>, 1998.
- Filhol, S. and Sturm, M.: Snow bedforms: A review, new data, and a formation model, *Journal of Geophysical Research: Earth Surface*, 120, 1645–1669, <https://doi.org/10.1002/2015JF003529>, 2015.
- 1040 Gallée, H.: Simulation of blowing snow over the antarctic ice sheet, *Annals of Glaciology*, 26, 203–206, <https://doi.org/10.3189/1998AoG26-1-203-206>, publisher: Cambridge University Press, 1998.
- Gerber, F., Sharma, V., and Lehning, M.: CRYOWRF - a validation and the effect of blowing snow on the Antarctic SMB, *Authorea*, <https://doi.org/10.22541/essoar.167591073.37929949/v1>, 2023.
- Giometto, M. G., Christen, A., Meneveau, C., Fang, J., Krafczyk, M., and Parlange, M. B.: Spatial Characteristics of Roughness Sublayer Mean Flow and Turbulence Over a Realistic Urban Surface, *Boundary-Layer Meteorology*, 160, 425–452, <https://doi.org/10.1007/s10546-016-0157-6>, 2016.
- 1045 Giometto, M. G., Christen, A., Egli, P. E., Schmid, M. F., Tooke, R. T., Coops, N. C., and Parlange, M. B.: Effects of trees on mean wind, turbulence and momentum exchange within and above a real urban environment, *Advances in Water Resources*, 106, 154–168, <https://doi.org/10.1016/j.advwatres.2017.06.018>, 2017.
- 1050 Gordon, M., Savelyev, S., and Taylor, P. A.: Measurements of blowing snow, part II: Mass and number density profiles and saltation height at Franklin Bay, NWT, Canada, *Cold Regions Science and Technology*, 55, 75–85, 2009.
- Groot Zwaaftink, C. D., Löwe, H., Mott, R., Bavay, M., and Lehning, M.: Drifting snow sublimation: A high-resolution 3-D model with temperature and moisture feedbacks, *Journal of Geophysical Research: Atmospheres*, 116, <https://doi.org/10.1029/2011JD015754>, 2011.
- Groot Zwaaftink, C. D., Diebold, M., Horender, S., Overney, J., Lieberherr, G., Parlange, M. B., and Lehning, M.: Modelling Small-Scale Drifting Snow with a Lagrangian Stochastic Model Based on Large-Eddy Simulations, *Boundary-Layer Meteorology*, 153, 117–139, <https://doi.org/10.1007/s10546-014-9934-2>, 2014.
- 1055 Hancock, H., Eckerstorfer, M., Prokop, A., and Hendriks, J.: Quantifying seasonal cornice dynamics using a terrestrial laser scanner in Svalbard, Norway, *Natural Hazards and Earth System Sciences*, 20, 603–623, <https://doi.org/10.5194/nhess-20-603-2020>, 2020.



- Ho, T. D., Valance, A., Dupont, P., and Ould El Moctar, A.: Scaling Laws in Aeolian Sand Transport, *Physical Review Letters*, 106, 094 501, 1060 <https://doi.org/10.1103/PhysRevLett.106.094501>, 2011.
- Jiménez, J.: Turbulent Flows over Rough Walls, *Annual Review of Fluid Mechanics*, 36, 173–196, <https://doi.org/10.1146/annurev.fluid.36.050802.122103>, 2004.
- Kawamura, R.: Study of sand movement by wind, Reports of Physical Sciences Research Institute of Tokyo University, nASA Technical Translation (NASA-TT-F-14215), 1972, 1951.
- 1065 Kok, J. F. and Renno, N. O.: A comprehensive numerical model of steady state saltation (COMSALT), *Journal of Geophysical Research: Atmospheres*, 114, <https://doi.org/10.1029/2009JD011702>, 2009.
- Kok, J. F., Parteli, E. J. R., Michaels, T. I., and Karam, D. B.: The physics of wind-blown sand and dust, *Reports on Progress in Physics*, 75, 106 901, <https://doi.org/10.1088/0034-4885/75/10/106901>, 2012.
- Lehning, M., Löwe, H., Ryser, M., and Raderschall, N.: Inhomogeneous precipitation distribution and snow transport in steep terrain, *Water* 1070 *Resources Research*, 44, <https://doi.org/10.1029/2007WR006545>, 2008.
- Lenaerts, J. T. M. and van den Broeke, M. R.: Modeling drifting snow in Antarctica with a regional climate model: 2. Results, *Journal of Geophysical Research: Atmospheres*, 117, <https://doi.org/10.1029/2010JD015419>, 2012.
- Lenaerts, J. T. M., van den Broeke, M. R., Déry, S. J., et al.: Modeling drifting snow in Antarctica with a regional climate model: 1. Methods and model evaluation, *Journal of Geophysical Research: Atmospheres*, 117, <https://doi.org/10.1029/2011JD016145>, 2012.
- 1075 Li, B. and McKenna Neuman, C.: Boundary-layer turbulence characteristics during aeolian saltation, *Geophysical Research Letters*, 39, <https://doi.org/10.1029/2012GL052234>, 2012.
- Li, L. and Pomeroy, J. W.: Estimates of Threshold Wind Speeds for Snow Transport Using Meteorological Data, *Journal of Applied Meteorology and Climatology*, 36, 205–213, [https://doi.org/10.1175/1520-0450\(1997\)036<0205:EOTWSF>2.0.CO;2](https://doi.org/10.1175/1520-0450(1997)036<0205:EOTWSF>2.0.CO;2), 1997.
- Lin, Y.-L., Farley, R. D., and Orville, H. D.: Bulk Parameterization of the Snow Field in a Cloud Model, *Journal of Applied Meteorology and Climatology*, 22, 1065–1092, [https://doi.org/10.1175/1520-0450\(1983\)022<1065:BPOTSF>2.0.CO;2](https://doi.org/10.1175/1520-0450(1983)022<1065:BPOTSF>2.0.CO;2), 1983.
- 1080 Liston, G. and Sturm, M.: The role of winter sublimation in the Arctic moisture budget, *Hydrology Research*, 35, 325–334, <https://doi.org/10.2166/nh.2004.0024>, 2004.
- Martin, R. L. and Kok, J. F.: Wind-invariant saltation heights imply linear scaling of aeolian saltation flux with shear stress, *Science Advances*, 3, e1602 569, <https://doi.org/10.1126/sciadv.1602569>, 2017.
- 1085 Martin, R. L., Kok, J. F., Hugenholtz, C. H., Barchyn, T. E., Chamecki, M., and Ellis, J. T.: High-frequency measurements of aeolian saltation flux: Field-based methodology and applications, *Aeolian Research*, 30, 97–114, <https://doi.org/10.1016/j.aeolia.2017.12.003>, 2018.
- Melo, D. B., Sharma, V., Comola, F., Sigmund, A., and Lehning, M.: Modeling Snow Saltation: The Effect of Grain Size and Interparticle Cohesion, *Journal of Geophysical Research: Atmospheres*, 127, e2021JD035 260, <https://doi.org/10.1029/2021JD035260>, 2022.
- Monin, A. S.: The Atmospheric Boundary Layer, *Annual Review of Fluid Mechanics*, 2, 225–250, 1090 <https://doi.org/10.1146/annurev.fl.02.010170.001301>, 1970.
- Mott, R. and Lehning, M.: Meteorological Modeling of Very High-Resolution Wind Fields and Snow Deposition for Mountains, *Journal of Hydrometeorology*, 11, 934–949, <https://doi.org/10.1175/2010JHM1216.1>, 2010.
- Mott, R., Vionnet, V., and Grünewald, T.: The Seasonal Snow Cover Dynamics: Review on Wind-Driven Coupling Processes, *Frontiers in Earth Science*, 6, 2018.
- 1095 Nalpanis, P., Hunt, J. C. R., and Barrett, C. F.: Saltating particles over flat beds, *Journal of Fluid Mechanics*, 251, 661–685, <https://doi.org/10.1017/S0022112093003568>, publisher: Cambridge University Press, 1993.

- Namikas, S. L.: Field measurement and numerical modelling of aeolian mass flux distributions on a sandy beach, *Sedimentology*, 50, 303–326, <https://doi.org/10.1046/j.1365-3091.2003.00556.x>, 2003.
- 1100 Nemoto, M. and Nishimura, K.: Numerical simulation of snow saltation and suspension in a turbulent boundary layer, *Journal of Geophysical Research: Atmospheres*, 109, <https://doi.org/10.1029/2004JD004657>, 2004.
- Niiya, H. and Nishimura, K.: Spatiotemporal Structure of Aeolian Particle Transport on Flat Surface, *Journal of the Physical Society of Japan*, 86, 054 402, <https://doi.org/10.7566/JPSJ.86.054402>, 2017.
- Niiya, H. and Nishimura, K.: Hysteresis and Surface Shear Stresses During Snow-Particle Aeolian Transportation, *Boundary-Layer Meteorology*, 183, 447–467, <https://doi.org/10.1007/s10546-022-00688-8>, 2022.
- 1105 Nishimura, K. and Hunt, J. C. R.: Saltation and incipient suspension above a flat particle bed below a turbulent boundary layer, *Journal of Fluid Mechanics*, 417, 77–102, <https://doi.org/10.1017/S0022112000001014>, 2000.
- Nishimura, K. and Nemoto, M.: Blowing snow at Mizuho station, Antarctica, *Philosophical Transactions of the Royal Society A: Mathematical, Physical and Engineering Sciences*, 363, 1647–1662, <https://doi.org/10.1098/rsta.2005.1599>, 2005.
- Nishimura, K., Yokoyama, C., Ito, Y., et al.: Snow particle speeds in drifting snow: Snow particle speeds in drifting snow, *Journal of Geophysical Research: Atmospheres*, 119, 9901–9913, <https://doi.org/10.1002/2014JD021686>, 2014.
- 1110 Owen, P. R.: Saltation of uniform grains in air, *Journal of Fluid Mechanics*, 20, 225–242, 1964.
- Palm, S. P., Kayetha, V., Yang, Y., and Pauly, R.: Blowing snow sublimation and transport over Antarctica from 11 years of CALIPSO observations, *The Cryosphere*, 11, 2555–2569, <https://doi.org/10.5194/tc-11-2555-2017>, 2017.
- Paterna, E., Crivelli, P., and Lehning, M.: Decoupling of mass flux and turbulent wind fluctuations in drifting snow, *Geophysical Research Letters*, 43, 4441–4447, 2016.
- 1115 Pomeroy, J. W. and Gray, D. M.: Saltation of snow, *Water Resources Research*, 26, 1583–1594, 1990.
- Pomeroy, J. W. and Male, D. H.: Steady-state suspension of snow, *Journal of Hydrology*, 136, 275–301, [https://doi.org/10.1016/0022-1694\(92\)90015-N](https://doi.org/10.1016/0022-1694(92)90015-N), 1992.
- Prandtl, L.: The mechanics of viscous flows, in: *Aerodynamic Theory III*, edited by Durand, W. F., pp. 34–208, Springer Berlin, 1935.
- 1120 Raderschall, N., Lehning, M., and Schär, C.: Fine-scale modeling of the boundary layer wind field over steep topography, *Water Resources Research*, 44, <https://doi.org/10.1029/2007WR006544>, 2008.
- Rasmussen, K. R. and Sørensen, M.: Vertical variation of particle speed and flux density in aeolian saltation: Measurement and modeling, *Journal of Geophysical Research: Earth Surface*, 113, <https://doi.org/10.1029/2007JF000774>, 2008.
- Raupach, M. R.: Saltation layers, vegetation canopies and roughness lengths, in: *Aeolian Grain Transport 1*, edited by Barndorff-Nielsen, O. E. and Willetts, B. B., pp. 83–96, Springer Vienna, 1991.
- 1125 Sato, T., Kosugi, K., and Sato, A.: Saltation-layer structure of drifting snow observed in wind tunnel, *Annals of Glaciology*, 32, 203–208, <https://doi.org/10.3189/172756401781819184>, 2001.
- Schiller, L. and Nauman, A. Z.: Über die grundlegenden Berechnungen bei der SchwerSraftaufbereitung, *Zeitschrift des Vereines Deutscher Ingenieure*, 77, 318–320, 1933.
- 1130 Schmidt, R.: Estimates of threshold windspeed from particle sizes in blowing snow, *Cold Regions Science and Technology*, 4, 187–193, [https://doi.org/10.1016/0165-232X\(81\)90003-3](https://doi.org/10.1016/0165-232X(81)90003-3), 1981.
- Sharma, V., Parlange, M. B., and Calaf, M.: Perturbations to the Spatial and Temporal Characteristics of the Diurnally-Varying Atmospheric Boundary Layer Due to an Extensive Wind Farm, *Boundary-Layer Meteorology*, 162, 255–282, <https://doi.org/10.1007/s10546-016-0195-0>, 2017.

- 1135 Sharma, V., Comola, F., and Lehning, M.: On the suitability of the Thorpe–Mason model for calculating sublimation of saltating snow, *The Cryosphere*, 12, 3499–3509, <https://doi.org/10.5194/tc-12-3499-2018>, 2018.
- Sharma, V., Gerber, F., and Lehning, M.: Introducing CRYOWRF v1.0: multiscale atmospheric flow simulations with advanced snow cover modelling, *Geoscientific Model Development*, 16, 719–749, <https://doi.org/10.5194/gmd-16-719-2023>, 2023.
- Sigmund, A., Dujardin, J., Comola, F., Sharma, V., Huwald, H., Melo, D. B., Hirasawa, N., Nishimura, K., and Lehning, M.: Evidence of  
1140 Strong Flux Underestimation by Bulk Parametrizations During Drifting and Blowing Snow, *Boundary-Layer Meteorology*, 182, 119–146, <https://doi.org/10.1007/s10546-021-00653-x>, 2022.
- Skamarock, W. C., Klemp, J. B., Dudhia, J., et al.: A Description of the Advanced Research WRF Version 3, NCAR Technical Notes NCAR/TN-4751STR, 2008.
- Sommer, C. G., Wever, N., Fierz, C., and Lehning, M.: Investigation of a wind-packing event in Queen Maud Land, Antarctica, *The*  
1145 *Cryosphere*, 12, 2923–2939, <https://doi.org/10.5194/tc-12-2923-2018>, 2018.
- Stull, R. B.: *An Introduction to Boundary Layer Meteorology*, Kluwer Academic Publishers, 1988.
- Sugiura, K., Nishimura, K., Maeno, N., and Kimura, T.: Measurements of snow mass flux and transport rate at different particle diameters in drifting snow, *Cold Regions Science and Technology*, 27, 83–89, [https://doi.org/10.1016/S0165-232X\(98\)00002-0](https://doi.org/10.1016/S0165-232X(98)00002-0), 1998.
- Sørensen, M.: An analytic model of wind-blown sand transport, in: *Aeolian Grain Transport 1*, edited by Barndorff-Nielsen, O. E. and  
1150 Willetts, B. B., pp. 67–81, Springer Vienna, 1991.
- Sørensen, M.: On the rate of aeolian sand transport, *Geomorphology*, 59, 53–62, <https://doi.org/10.1016/j.geomorph.2003.09.005>, 2004.
- Takeuchi, M.: Vertical profile and Horizontal Increase of Drift-Snow Transport, *Journal of Glaciology*, 26, 481–492, <https://doi.org/10.3189/S0022143000010996>, 1980.
- Thorpe, A. D. and Mason, B. J.: The evaporation of ice spheres and ice crystals, *British Journal of Applied Physics*, 17, 541–548,  
1155 <https://doi.org/10.1088/0508-3443/17/4/316>, 1966.
- Ungar, J. E. and Haff, P. K.: Steady state saltation in air, *Sedimentology*, 34, 289–299, 1987.
- van den Broeke, M., König-Langlo, G., Picard, G., Kuipers Munneke, P., and Lenaerts, J.: Surface energy balance, melt and sublimation at Neumayer Station, East Antarctica, *Antarctic Science*, 22, 87–96, <https://doi.org/10.1017/S0954102009990538>, 2010.
- van Wessem, J. M., van de Berg, W. J., Noël, B. P. Y., et al.: Modelling the climate and surface mass balance of polar ice sheets using  
1160 RACMO2 – Part 2: Antarctica (1979–2016), *The Cryosphere*, 12, 1479–1498, <https://doi.org/10.5194/tc-12-1479-2018>, 2018.
- Vionnet, V., Martin, E., Masson, V., et al.: Simulation of wind-induced snow transport and sublimation in alpine terrain using a fully coupled snowpack/atmosphere model, *The Cryosphere*, 8, 395–415, <https://doi.org/10.5194/tc-8-395-2014>, 2014.
- Walter, B., Horender, S., Voegeli, C., and Lehning, M.: Experimental assessment of Owen’s second hypothesis on surface shear stress induced by a fluid during sediment saltation, *Geophysical Research Letters*, 41, 6298–6305, <https://doi.org/10.1002/2014GL061069>, 2014.
- 1165 Werner, B. T.: A Steady-State Model of Wind-Blown Sand Transport, *The Journal of Geology*, 98, 1–17, 1990.
- Yu, H., Li, G., Walter, B., Lehning, M., Zhang, J., and Huang, N.: Environmental Conditions for Snow Cornice Formation tested in a Wind Tunnel, *The Cryosphere Discussions*, pp. 1–15, <https://doi.org/10.5194/tc-2022-27>, 2022.
